# Supplementary material for: Using Canine Olfaction to Detect Bovine Respiratory Disease: A Pilot Study
Source: Front Vet Sci. 2022 Jul 1;9:902151. doi: 10.3389/fvets.2022.902151 (PMC9284318; doi:10.3389/fvets.2022.902151)
Supplement: Supplementary file 1 [file Data_Sheet_1.XLSX]

## Sheet: Sheet1
Date	Day of the Week	Dog	Trial #	Correct Position	1st Response	2nd Response	3rd Response	Reinforced	Error	Pos Sample (A) ID	Neg Sample (B) ID	Neg Sample (C) ID	Pos 1	Pos 2	Pos 3	Batch Diff	Sex Diff
2021-08-23	Monday	Cheaps	1	2	3			0	1	6442	6451	6434	C	A	B	NNN	BBS
2021-08-23	Monday	Cheaps	2	1	2	3	1	1	1	6442	6451	6434	A	B	C	NNN	BBS
2021-08-23	Monday	Cheaps	3	3	2			0	1	6436	6443	6441	B	C	A	NNN	BBS
2021-08-23	Monday	Cheaps	4	1	2	1		1	1	6436	6443	6441	A	C	B	NNN	BBS
2021-08-23	Monday	Cheaps	5	2	1			0	1	6183	6176	6295	B	A	C	DDJ	BBS
2021-08-23	Monday	Cheaps	6	2	1	3	2	1	1	6183	6176	6295	C	A	B	DDJ	BBS
2021-08-23	Monday	Cheaps	7	3	3			1	0	6186	6388	6231	C	B	A	DMJ	BSS
2021-08-23	Monday	Cheaps	8	1	3	1		1	1	6186	6388	6231	A	C	B	DMJ	BSS
2021-08-23	Monday	Cheaps	9	1	3			0	1	6412	6392	6415	A	C	B	MMM	SBB
2021-08-23	Monday	Cheaps	10	1	1			1	0	6412	6392	6415	A	C	B	MMM	SBB
2021-08-23	Monday	Cheaps	11	2	2			1	0	6116	6195	6300	B	A	C	DDJ	BBB
2021-08-23	Monday	Cheaps	12	2	3	2		1	1	6116	6195	6300	C	A	B	DDJ	BBB
2021-08-23	Monday	Cheaps	13	2	2			1	0	6384	6391	6396	B	A	C	MMM	BBS
2021-08-23	Monday	Cheaps	14	3	3			1	0	6384	6391	6396	C	B	A	MMM	BBS
2021-08-23	Monday	Cheaps	15	1	3			0	1	6445	6460	6482	A	B	C	NNN	BBS
2021-08-23	Monday	Cheaps	16	2	2			1	0	6445	6460	6482	B	A	C	NNN	BBS
2021-08-23	Monday	Cheaps	17	1	3			0	1	6151	6347	6294	A	C	B	DMJ	BBB
2021-08-23	Monday	Cheaps	18	1	2	1		1	1	6151	6347	6294	A	B	C	DMJ	BBB
2021-08-23	Monday	Cheaps	19	1	3			0	1	6361	6339	6368	A	C	B	MMM	BBS
2021-08-23	Monday	Cheaps	20	2	2			1	0	6361	6339	6368	C	A	B	MMM	BBS
2021-08-23	Monday	Cheaps	21	3	3			1	0	6467	6485	6435	C	B	A	NNN	BBB
2021-08-23	Monday	Cheaps	22	3	2	1	3	1	1	6467	6485	6435	B	C	A	NNN	BBB
2021-08-23	Monday	Runnels	1	3	2			0	1	6442	6451	6434	B	C	A	NNN	BBS
2021-08-23	Monday	Runnels	2	1	1			1	0	6442	6451	6434	A	B	C	NNN	BBS
2021-08-23	Monday	Runnels	3	2	2			1	0	6436	6443	6441	C	A	B	NNN	BBS
2021-08-23	Monday	Runnels	4	2	2			1	0	6436	6443	6441	B	A	C	NNN	BBS
2021-08-23	Monday	Runnels	5	3	3			1	0	6183	6176	6295	C	B	A	DDJ	BBS
2021-08-23	Monday	Runnels	6	1	1			1	0	6183	6176	6295	A	C	B	DDJ	BBS
2021-08-23	Monday	Runnels	7	3	3			1	0	6186	6388	6231	C	B	A	DMJ	BSS
2021-08-23	Monday	Runnels	8	2	2			1	0	6186	6388	6231	B	A	C	DMJ	BSS
2021-08-23	Monday	Runnels	9	3	2			0	1	6412	6392	6415	B	C	A	MMM	SBB
2021-08-23	Monday	Runnels	10	2	3	2		1	1	6412	6392	6415	B	A	C	MMM	SBB
2021-08-23	Monday	Runnels	11	2	3			0	1	6116	6195	6300	B	A	C	DDJ	BBB
2021-08-23	Monday	Runnels	12	2	2			1	0	6116	6195	6300	C	A	B	DDJ	BBB
2021-08-23	Monday	Runnels	13	3	1			0	1	6384	6391	6396	C	B	A	MMM	BBS
2021-08-23	Monday	Runnels	14	3	3			1	0	6384	6391	6396	C	B	A	MMM	BBS
2021-08-23	Monday	Runnels	15	1	1			1	0	6445	6460	6482	A	B	C	NNN	BBS
2021-08-23	Monday	Runnels	16	1	2	1		1	1	6445	6460	6482	A	B	C	NNN	BBS
2021-08-23	Monday	Runnels	17	2	1			0	1	6151	6347	6294	B	A	C	DMJ	BBB
2021-08-23	Monday	Runnels	18	2	2			1	0	6151	6347	6294	B	A	C	DMJ	BBB
2021-08-23	Monday	Runnels	19	2	3			0	1	6361	6339	6368	C	A	B	MMM	BBS
2021-08-23	Monday	Runnels	20	1	1			1	0	6361	6339	6368	A	C	B	MMM	BBS
2021-08-23	Monday	Runnels	21	1	1			1	0	6467	6485	6435	A	C	B	NNN	BBB
2021-08-23	Monday	Runnels	22	2	2			1	0	6467	6485	6435	B	A	C	NNN	BBB
2021-08-24	Tuesday	Cheaps	1	1	1			1	0	6457	6484	6493	A	B	C	NNN	BBS
2021-08-24	Tuesday	Cheaps	2	1	2	1		1	1	6457	6484	6493	A	C	B	NNN	BBS
2021-08-24	Tuesday	Cheaps	3	3	2			0	1	6357	6327	6405	B	C	A	MMM	SXB
2021-08-24	Tuesday	Cheaps	4	3	2	1	3	1	1	6357	6327	6405	C	B	A	MMM	SXB
2021-08-24	Tuesday	Cheaps	5	2	1			0	1	6205	6189	6290	C	A	B	DDJ	BBB
2021-08-24	Tuesday	Cheaps	6	1	2	1		1	1	6205	6189	6290	A	B	C	DDJ	BBB
2021-08-24	Tuesday	Cheaps	7	2	1			0	1	6341	6324	6420	B	A	C	MMM	BBB
2021-08-24	Tuesday	Cheaps	8	2	3	2		1	1	6341	6324	6420	B	A	C	MMM	BBB
2021-08-24	Tuesday	Cheaps	9	1	3			0	1	6132	6351	6308	A	B	C	DMJ	BBS
2021-08-24	Tuesday	Cheaps	10	3	3			1	0	6132	6351	6308	B	C	A	DMJ	BBS
2021-08-24	Tuesday	Cheaps	11	2	1			0	1	6363	6331	6385	B	A	C	MMM	BBB
2021-08-24	Tuesday	Cheaps	12	2	3	2		1	1	6363	6331	6385	B	A	C	MMM	BBB
2021-08-24	Tuesday	Cheaps	13	2	2			1	0	6144	6355	6238	B	A	C	DMJ	BBB
2021-08-24	Tuesday	Cheaps	14	1	3	2	1	1	1	6144	6355	6238	A	C	B	DMJ	BBB
2021-08-24	Tuesday	Cheaps	15	2	2			1	0	6411	6401	6293	B	A	C	MMD	BBS
2021-08-24	Tuesday	Cheaps	16	3	3			1	0	6411	6401	6293	B	C	A	MMD	BBS
2021-08-24	Tuesday	Cheaps	17	3	3			1	0	6190	6162	6315	C	B	A	DDJ	BSS
2021-08-24	Tuesday	Cheaps	18	3	3			1	0	6190	6162	6315	C	B	A	DDJ	BSS
2021-08-24	Tuesday	Cheaps	19	2	2			1	0	6170	6390	6224	C	A	B	DMJ	BBB
2021-08-24	Tuesday	Cheaps	20	3	3			1	0	6170	6390	6224	B	C	A	DMJ	BBB
2021-08-24	Tuesday	Runnels	1	2	1			0	1	6457	6484	6493	B	A	C	NNN	BBS
2021-08-24	Tuesday	Runnels	2	2	2			1	0	6457	6484	6493	B	A	C	NNN	BBS
2021-08-24	Tuesday	Runnels	3	2	1			0	1	6357	6327	6405	C	A	B	MMM	SXB
2021-08-24	Tuesday	Runnels	4	2	1	3	2	1	1	6357	6327	6405	C	A	B	MMM	SXB
2021-08-24	Tuesday	Runnels	5	2	1			0	1	6205	6189	6290	C	A	B	DDJ	BBB
2021-08-24	Tuesday	Runnels	6	3	1	3		1	1	6205	6189	6290	B	C	A	DDJ	BBB
2021-08-24	Tuesday	Runnels	7	1	2			0	1	6341	6324	6420	A	C	B	MMM	BBB
2021-08-24	Tuesday	Runnels	8	1	3	2	1	1	1	6341	6324	6420	A	C	B	MMM	BBB
2021-08-24	Tuesday	Runnels	9	3	1			0	1	6132	6351	6308	C	B	A	DMJ	BBS
2021-08-24	Tuesday	Runnels	10	1	2	1		1	1	6132	6351	6308	A	B	C	DMJ	BBS
2021-08-24	Tuesday	Runnels	11	3	1			0	1	6363	6331	6385	C	B	A	MMM	BBB
2021-08-24	Tuesday	Runnels	12	2	2			1	0	6363	6331	6385	C	A	B	MMM	BBB
2021-08-24	Tuesday	Runnels	13	1	1			1	0	6144	6355	6238	A	B	C	DMJ	BBB
2021-08-24	Tuesday	Runnels	14	2	3	2		1	1	6144	6355	6238	C	A	B	DMJ	BBB
2021-08-24	Tuesday	Runnels	15	3	3			1	0	6411	6401	6293	B	C	A	MMD	BBS
2021-08-24	Tuesday	Runnels	16	3	3			1	0	6411	6401	6293	C	B	A	MMD	BBS
2021-08-24	Tuesday	Runnels	17	1	3			0	1	6190	6162	6315	A	C	B	DDJ	BSS
2021-08-24	Tuesday	Runnels	18	1	2	1		1	1	6190	6162	6315	A	C	B	DDJ	BSS
2021-08-24	Tuesday	Runnels	19	1	2			0	1	6170	6390	6224	A	B	C	DMJ	BBB
2021-08-24	Tuesday	Runnels	20	2	2			1	0	6170	6390	6224	B	A	C	DMJ	BBB
2021-08-25	Wednesday	Cheaps	1	3	2			0	1	6120	6140	6312	C	B	A	DDJ	BBB
2021-08-25	Wednesday	Cheaps	2	1	1			1	0	6120	6140	6312	A	C	B	DDJ	BBB
2021-08-25	Wednesday	Cheaps	3	3	1			0	1	6402	6366	6421	C	B	A	MMM	BBS
2021-08-25	Wednesday	Cheaps	4	3	3			1	0	6402	6366	6421	B	C	A	MMM	BBS
2021-08-25	Wednesday	Cheaps	5	1	2			0	1	6389	6408	6403	A	B	C	MMM	BBB
2021-08-25	Wednesday	Cheaps	6	3	1	3		1	1	6389	6408	6403	B	C	A	MMM	BBB
2021-08-25	Wednesday	Cheaps	7	2	1			0	1	6474	6473	6305	B	A	C	NNM	BBB
2021-08-25	Wednesday	Cheaps	8	1	3	2	1	1	1	6474	6473	6305	A	C	B	NNM	BBB
2021-08-25	Wednesday	Cheaps	9	2	2			1	0	6135	6404	6262	C	A	B	DMJ	BBS
2021-08-25	Wednesday	Cheaps	10	1	2	1		1	1	6135	6404	6262	A	B	C	DMJ	BBS
2021-08-25	Wednesday	Cheaps	11	2	2			1	0	6340	6346	6418	C	A	B	MMM	BBS
2021-08-25	Wednesday	Cheaps	12	3	1	3		1	1	6340	6346	6418	C	B	A	MMM	BBS
2021-08-25	Wednesday	Cheaps	13	1	2			0	1	6470	6498	6465	A	B	C	NNN	BBB
2021-08-25	Wednesday	Cheaps	14	2	3	2		1	1	6470	6498	6465	C	A	B	NNN	BBB
2021-08-25	Wednesday	Cheaps	15	2	2			1	0	6428	6483	6437	C	A	B	NNN	BBS
2021-08-25	Wednesday	Cheaps	16	3	3			1	0	6428	6483	6437	C	B	A	NNN	BBS
2021-08-25	Wednesday	Cheaps	17	2	2			1	0	6322	6348	6406	C	A	B	MMM	BBS
2021-08-25	Wednesday	Cheaps	18	3	3			1	0	6322	6348	6406	B	C	A	MMM	BBS
2021-08-25	Wednesday	Cheaps	19	1	3			0	1	6447	6487	6450	A	C	B	NNN	BBS
2021-08-25	Wednesday	Cheaps	20	2	2			1	0	6447	6487	6450	B	A	C	NNN	BBS
2021-08-25	Wednesday	Runnels	1	1	1			1	0	6120	6140	6312	A	B	C	DDJ	BBB
2021-08-25	Wednesday	Runnels	2	3	3			1	0	6120	6140	6312	C	B	A	DDJ	BBB
2021-08-25	Wednesday	Runnels	3	1	1			0	0	6402	6366	6421	A	C	B	MMM	BBS
2021-08-25	Wednesday	Runnels	4	3	2	1	3	1	1	6402	6366	6421	C	B	A	MMM	BBS
2021-08-25	Wednesday	Runnels	5	3	1			0	1	6389	6408	6403	C	B	A	MMM	BBB
2021-08-25	Wednesday	Runnels	6	3	1	2	3	1	1	6389	6408	6403	C	B	A	MMM	BBB
2021-08-25	Wednesday	Runnels	7	3	2			0	1	6474	6473	6305	C	B	A	NNM	BBB
2021-08-25	Wednesday	Runnels	8	2	3	1	2	1	1	6474	6473	6305	B	A	C	NNM	BBB
2021-08-25	Wednesday	Runnels	9	2	3			0	1	6135	6404	6262	C	A	B	DMJ	BBS
2021-08-25	Wednesday	Runnels	10	2	3	2		1	1	6135	6404	6262	C	A	B	DMJ	BBS
2021-08-25	Wednesday	Runnels	11	1	3			0	1	6340	6346	6418	A	C	B	MMM	BBS
2021-08-25	Wednesday	Runnels	12	3	3			1	0	6340	6346	6418	B	C	A	MMM	BBS
2021-08-25	Wednesday	Runnels	13	1	2			0	1	6470	6498	6465	A	B	C	NNN	BBB
2021-08-25	Wednesday	Runnels	14	1	1			1	0	6470	6498	6465	A	B	C	NNN	BBB
2021-08-25	Wednesday	Runnels	15	1	2			0	1	6428	6483	6437	A	C	B	NNN	BBS
2021-08-25	Wednesday	Runnels	16	3	3			1	0	6428	6483	6437	B	C	A	NNN	BBS
2021-08-25	Wednesday	Runnels	17	3	3			1	0	6322	6348	6406	C	B	A	MMM	BBS
2021-08-25	Wednesday	Runnels	18	1	2	1		1	1	6322	6348	6406	A	B	C	MMM	BBS
2021-08-25	Wednesday	Runnels	19	3	3			1	0	6447	6487	6450	C	B	A	NNN	BBS
2021-08-25	Wednesday	Runnels	20	1	3	1		1	1	6447	6487	6450	A	C	B	NNN	BBS
2021-08-26	Thursday	Cheaps	1	3	3			1	0	6169	6202	6288	B	C	A	DDJ	BBB
2021-08-26	Thursday	Cheaps	2	3	3			1	0	6169	6202	6288	B	C	A	DDJ	BBB
2021-08-26	Thursday	Cheaps	3	3	3			1	0	6352	6358	6376	C	B	A	MMM	SBB
2021-08-26	Thursday	Cheaps	4	2	3	2		1	1	6352	6358	6376	C	A	B	MMM	SBB
2021-08-26	Thursday	Cheaps	5	1	1			1	0	6481	6479	6492	A	C	B	NNN	SSB
2021-08-26	Thursday	Cheaps	6	3	3			1	0	6481	6479	6492	B	C	A	NNN	SSB
2021-08-26	Thursday	Cheaps	7	1	1			1	0	6455	6489	6453	A	C	B	NNN	BBB
2021-08-26	Thursday	Cheaps	8	1	1			1	0	6455	6489	6453	A	C	B	NNN	BBB
2021-08-26	Thursday	Cheaps	9	2	2			1	0	6399	6394	6336	B	A	C	MMM	BSS
2021-08-26	Thursday	Cheaps	10	1	3	2	1	1	1	6399	6394	6336	A	B	C	MMM	BSS
2021-08-26	Thursday	Cheaps	11	3	2			0	1	6141	6360	6261	B	C	A	DMJ	BBS
2021-08-26	Thursday	Cheaps	12	3	2	1	3	1	1	6141	6360	6261	B	C	A	DMJ	BBS
2021-08-26	Thursday	Cheaps	13	3	2			0	1	6374	6422	6349	C	B	A	MMM	BBS
2021-08-26	Thursday	Cheaps	14	3	2	1	3	1	1	6374	6422	6349	B	C	A	MMM	BBS
2021-08-26	Thursday	Cheaps	15	2	2			1	0	6342	6335	6380	C	A	B	MMM	BBS
2021-08-26	Thursday	Cheaps	16	3	3			1	0	6342	6335	6380	C	B	A	MMM	BBS
2021-08-26	Thursday	Cheaps	17	1	3			0	1	6480	6469	6462	A	B	C	NNN	BBB
2021-08-26	Thursday	Cheaps	18	1	3	2	1	1	1	6480	6469	6462	A	C	B	NNN	BBB
2021-08-26	Thursday	Cheaps	19	3	2			0	1	6386	6398	6359	B	C	A	MMM	BBB
2021-08-26	Thursday	Cheaps	20	1	1			1	0	6386	6398	6359	A	B	C	MMM	BBB
2021-08-26	Thursday	Runnels	1	2	2			1	0	6169	6202	6288	B	A	C	DDJ	BBB
2021-08-26	Thursday	Runnels	2	2	1	2		1	1	6169	6202	6288	B	A	C	DDJ	BBB
2021-08-26	Thursday	Runnels	3	2	1			0	1	6352	6358	6376	B	A	C	MMM	SBB
2021-08-26	Thursday	Runnels	4	3	3			1	0	6352	6358	6376	B	C	A	MMM	SBB
2021-08-26	Thursday	Runnels	5	3	1			0	1	6481	6479	6492	B	C	A	NNN	SSB
2021-08-26	Thursday	Runnels	6	1	3	2	1	1	1	6481	6479	6492	A	B	C	NNN	SSB
2021-08-26	Thursday	Runnels	7	1	2			0	1	6455	6489	6453	A	B	C	NNN	BBB
2021-08-26	Thursday	Runnels	8	3	2	1	3	1	1	6455	6489	6453	C	B	A	NNN	BBB
2021-08-26	Thursday	Runnels	9	1	3			0	1	6399	6394	6336	A	C	B	MMM	BSS
2021-08-26	Thursday	Runnels	10	2	1	3	2	1	1	6399	6394	6336	C	A	B	MMM	BSS
2021-08-26	Thursday	Runnels	11	2	3			0	1	6141	6360	6261	B	A	C	DMJ	BBS
2021-08-26	Thursday	Runnels	12	2	1	2		1	1	6141	6360	6261	C	A	B	DMJ	BBS
2021-08-26	Thursday	Runnels	13	1	1			1	0	6374	6422	6349	A	B	C	MMM	BBS
2021-08-26	Thursday	Runnels	14	3	3			1	0	6374	6422	6349	B	C	A	MMM	BBS
2021-08-26	Thursday	Runnels	15	1	2			0	1	6342	6335	6380	A	C	B	MMM	BBS
2021-08-26	Thursday	Runnels	16	2	1	2		1	1	6342	6335	6380	C	A	B	MMM	BBS
2021-08-26	Thursday	Runnels	17	3	1			0	1	6480	6469	6462	B	C	A	NNN	BBB
2021-08-26	Thursday	Runnels	18	2	3	1	2	1	1	6480	6469	6462	C	A	B	NNN	BBB
2021-08-26	Thursday	Runnels	19	3	2			0	1	6386	6398	6359	B	C	A	MMM	BBB
2021-08-26	Thursday	Runnels	20	2	1	3	2	1	1	6386	6398	6359	C	A	B	MMM	BBB
