# Supplementary material for: Using Canine Olfaction to Detect Bovine Respiratory Disease: A Pilot Study
Source: Front Vet Sci. 2022 Jul 1;9:902151. doi: 10.3389/fvets.2022.902151 (PMC9284318; doi:10.3389/fvets.2022.902151)
Supplement: Supplementary file 2 [file Data_Sheet_2.XLSX]

## Sheet: Sheet1
Date	Day of the Week	Dog	Trial #	Stage	Correct Position	Response	Reinforced	Error	Pos Sample (A) ID	Neg Sample (B) ID	Neg Sample (C) ID	Pos 1	Pos 2	Pos 3
2021-02-01	Monday	Cheaps	1	Food	3	0	1	1
2021-02-01	Monday	Cheaps	2	Food	1	0	1	1
2021-02-01	Monday	Cheaps	3	Food	1	0	1	1
2021-02-01	Monday	Cheaps	4	Food	3	0	1	1
2021-02-01	Monday	Cheaps	5	Food	3	0	1	1
2021-02-01	Monday	Cheaps	6	Food	3	0	1	1
2021-02-01	Monday	Cheaps	7	Food	1	0	1	1
2021-02-01	Monday	Cheaps	8	Food	1	0	1	1
2021-02-01	Monday	Cheaps	9	Food	2	0	1	1
2021-02-01	Monday	Cheaps	10	Food	3	0	1	1
2021-02-01	Monday	Cheaps	11	Food	2	0	1	1
2021-02-01	Monday	Cheaps	12	Food	3	0	1	1
2021-02-01	Monday	Cheaps	13	Food	1	0	1	1
2021-02-01	Monday	Cheaps	14	Food	3	0	1	1
2021-02-01	Monday	Cheaps	15	Food	2	0	1	1
2021-02-01	Monday	Cheaps	16	Food	2	0	1	1
2021-02-01	Monday	Cheaps	17	Food	1	0	1	1
2021-02-01	Monday	Cheaps	18	Food	2	0	1	1
2021-02-01	Monday	Cheaps	19	Food	1	0	1	1
2021-02-01	Monday	Cheaps	20	Food	3	0	1	1
2021-02-01	Monday	Cheaps	21	Food	1	0	1	1
2021-02-01	Monday	Cheaps	22	Food	3	0	1	1
2021-02-01	Monday	Cheaps	23	Food	1	0	1	1
2021-02-01	Monday	Cheaps	24	Food	3	0	1	1
2021-02-01	Monday	Cheaps	25	Food	3	0	1	1
2021-02-01	Monday	Cheaps	26	Food	3	0	1	1
2021-02-01	Monday	Cheaps	27	Food	1	0	1	1
2021-02-01	Monday	Cheaps	28	Food	3	0	1	1
2021-02-01	Monday	Cheaps	29	Food	3	0	1	1
2021-02-01	Monday	Cheaps	30	Food	1	0	1	1
2021-02-01	Monday	Cheaps	31	Food	3	0	1	1
2021-02-01	Monday	Cheaps	32	Food	2	0	1	1
2021-02-01	Monday	Cheaps	33	Food	2	0	1	1
2021-02-01	Monday	Cheaps	34	Food	3	0	1	1
2021-02-01	Monday	Cheaps	35	Food	2	0	1	1
2021-02-01	Monday	Cheaps	36	Food	3	0	1	1
2021-02-01	Monday	Cheaps	37	Food	1	0	1	1
2021-02-01	Monday	Cheaps	38	Food	1	0	1	1
2021-02-01	Monday	Cheaps	39	Food	1	0	1	1
2021-02-01	Monday	Cheaps	40	Food	3	0	1	1
2021-02-01	Monday	Runnels	1	Food	2	0	1	1
2021-02-01	Monday	Runnels	2	Food	3	0	1	1
2021-02-01	Monday	Runnels	3	Food	3	0	1	1
2021-02-01	Monday	Runnels	4	Food	3	0	1	1
2021-02-01	Monday	Runnels	5	Food	2	0	1	1
2021-02-01	Monday	Runnels	6	Food	3	0	1	1
2021-02-01	Monday	Runnels	7	Food	1	0	1	1
2021-02-01	Monday	Runnels	8	IA-3	1	0	1	1
2021-02-01	Monday	Runnels	9	IA-3	1	0	1	1
2021-02-01	Monday	Runnels	10	IA-3	3	0	1	1
2021-02-01	Monday	Runnels	11	IA-3	3	0	1	1
2021-02-01	Monday	Runnels	12	IA-3	3	0	1	1
2021-02-01	Monday	Runnels	13	IA-3	2	0	1	1
2021-02-01	Monday	Runnels	14	IA-3	1	0	1	1
2021-02-01	Monday	Runnels	15	IA-3	3	0	1	1
2021-02-01	Monday	Runnels	16	IA-3	2	0	1	1
2021-02-01	Monday	Runnels	17	IA-3	3	0	1	1
2021-02-01	Monday	Runnels	18	IA-3	2	0	1	1
2021-02-01	Monday	Runnels	19	IA-3	3	0	1	1
2021-02-01	Monday	Runnels	20	IA-3	2	0	1	1
2021-02-01	Monday	Runnels	21	IA-3	2	0	1	1
2021-02-01	Monday	Runnels	22	IA-3	3	0	1	1
2021-02-01	Monday	Runnels	23	IA-3	3	0	1	1
2021-02-01	Monday	Runnels	24	IA-3	2	0	1	1
2021-02-01	Monday	Runnels	25	IA-3	3	0	1	1
2021-02-01	Monday	Runnels	26	IA-3	3	0	1	1
2021-02-01	Monday	Runnels	27	IA-3	1	0	1	1
2021-02-01	Monday	Runnels	28	IA-3	3	0	1	1
2021-02-01	Monday	Runnels	29	IA-3	3	0	1	1
2021-02-01	Monday	Runnels	30	IA-3	2	0	1	1
2021-02-01	Monday	Runnels	31	IA-3	3	0	1	1
2021-02-01	Monday	Runnels	32	IA-3	3	0	1	1
2021-02-01	Monday	Runnels	33	IA-3	1	0	1	1
2021-02-01	Monday	Runnels	34	IA-3	1	0	1	1
2021-02-01	Monday	Runnels	35	IA-3	1	0	1	1
2021-02-01	Monday	Runnels	36	IA-3	2	0	1	1
2021-02-01	Monday	Runnels	37	IA-3	1	0	1	1
2021-02-01	Monday	Runnels	38	IA-3	3	0	1	1
2021-02-01	Monday	Runnels	39	IA-3	3	0	1	1
2021-02-01	Monday	Runnels	40	IA-3	3	0	1	1
2021-02-02	Tuesday	Cheaps	1	Food	3	0	1	1
2021-02-02	Tuesday	Cheaps	2	Food	1	0	1	1
2021-02-02	Tuesday	Cheaps	3	Food	1	0	1	1
2021-02-02	Tuesday	Cheaps	4	Food	2	0	1	1
2021-02-02	Tuesday	Cheaps	5	Food	2	0	1	1
2021-02-02	Tuesday	Cheaps	6	Food	2	0	1	1
2021-02-02	Tuesday	Cheaps	7	Food	3	0	1	1
2021-02-02	Tuesday	Cheaps	8	Food	2	0	1	1
2021-02-02	Tuesday	Cheaps	9	Food	3	0	1	1
2021-02-02	Tuesday	Cheaps	10	Food	3	0	1	1
2021-02-02	Tuesday	Cheaps	11	Food	3	0	1	1
2021-02-02	Tuesday	Cheaps	12	Food	3	0	1	1
2021-02-02	Tuesday	Cheaps	13	Food	1	0	1	1
2021-02-02	Tuesday	Cheaps	14	Food	1	0	1	1
2021-02-02	Tuesday	Cheaps	15	Food	3	0	1	1
2021-02-02	Tuesday	Cheaps	16	Food	1	0	1	1
2021-02-02	Tuesday	Cheaps	17	Food	2	0	1	1
2021-02-02	Tuesday	Cheaps	18	Food	1	0	1	1
2021-02-02	Tuesday	Cheaps	19	Food	1	0	1	1
2021-02-02	Tuesday	Cheaps	20	Food	2	0	1	1
2021-02-02	Tuesday	Cheaps	21	Food	1	0	1	1
2021-02-02	Tuesday	Cheaps	22	Food	2	0	1	1
2021-02-02	Tuesday	Cheaps	23	Food	2	0	1	1
2021-02-02	Tuesday	Cheaps	24	Food	1	0	1	1
2021-02-02	Tuesday	Cheaps	25	Food	3	0	1	1
2021-02-02	Tuesday	Cheaps	26	Food	1	0	1	1
2021-02-02	Tuesday	Cheaps	27	Food	2	0	1	1
2021-02-02	Tuesday	Cheaps	28	Food	1	0	1	1
2021-02-02	Tuesday	Cheaps	29	Food	2	0	1	1
2021-02-02	Tuesday	Cheaps	30	Food	2	0	1	1
2021-02-02	Tuesday	Cheaps	31	Food	1	0	1	1
2021-02-02	Tuesday	Cheaps	32	Food	3	0	1	1
2021-02-02	Tuesday	Cheaps	33	Food	2	2	0	0
2021-02-02	Tuesday	Cheaps	34	Food	2	2	0	0
2021-02-02	Tuesday	Cheaps	35	Food	2	2	0	0
2021-02-02	Tuesday	Cheaps	36	Food	1	1	0	0
2021-02-02	Tuesday	Cheaps	37	Food	2	2	0	0
2021-02-02	Tuesday	Cheaps	38	Food	3	3	0	0
2021-02-02	Tuesday	Cheaps	39	Food	1	1	0	0
2021-02-02	Tuesday	Cheaps	40	Food	3	3	0	0
2021-02-02	Tuesday	Runnels	1	Food	2	2	1	0
2021-02-02	Tuesday	Runnels	2	Food	2	2	1	0
2021-02-02	Tuesday	Runnels	3	Food	3	3	1	0
2021-02-02	Tuesday	Runnels	4	Food	3	0	1	1
2021-02-02	Tuesday	Runnels	5	Food	2	2	1	0
2021-02-02	Tuesday	Runnels	6	IA-3	1	0	1	1
2021-02-02	Tuesday	Runnels	7	IA-3	2	0	1	1
2021-02-02	Tuesday	Runnels	8	IA-3	1	1	1	0
2021-02-02	Tuesday	Runnels	9	IA-3	2	0	1	1
2021-02-02	Tuesday	Runnels	10	IA-3	2	2	1	0
2021-02-02	Tuesday	Runnels	11	Food	2	0	1	1
2021-02-02	Tuesday	Runnels	12	Food	1	1	1	0
2021-02-02	Tuesday	Runnels	13	Food	2	2	1	0
2021-02-02	Tuesday	Runnels	14	Food	1	1	0	0
2021-02-02	Tuesday	Runnels	15	Food	1	1	0	0
2021-02-02	Tuesday	Runnels	16	IA-3	2	2	0	0
2021-02-02	Tuesday	Runnels	17	IA-3	2	2	0	0
2021-02-02	Tuesday	Runnels	18	IA-3	3	3	1	0
2021-02-02	Tuesday	Runnels	19	IA-3	2	2	0	0
2021-02-02	Tuesday	Runnels	20	IA-3	1	1	0	0
2021-02-02	Tuesday	Runnels	21	Food	3	1	1	1
2021-02-02	Tuesday	Runnels	22	Food	1	1	0	0
2021-02-02	Tuesday	Runnels	23	Food	3	3	1	0
2021-02-02	Tuesday	Runnels	24	Food	2	1	1	1
2021-02-02	Tuesday	Runnels	25	Food	2	0	1	1
2021-02-02	Tuesday	Runnels	26	Food	3	0	1	1
2021-02-02	Tuesday	Runnels	27	Food	3	3	1	0
2021-02-02	Tuesday	Runnels	28	Food	1	1	0	0
2021-02-02	Tuesday	Runnels	29	Food	3	3	0	0
2021-02-02	Tuesday	Runnels	30	Food	3	3	0	0
2021-02-02	Tuesday	Runnels	31	IA-3	2	2	0	0
2021-02-02	Tuesday	Runnels	32	IA-3	3	3	0	0
2021-02-02	Tuesday	Runnels	33	IA-3	2	2	1	0
2021-02-02	Tuesday	Runnels	34	IA-3	1	1	1	0
2021-02-02	Tuesday	Runnels	35	IA-3	2	0	1	1
2021-02-02	Tuesday	Runnels	36	Food	2	2	0	0
2021-02-02	Tuesday	Runnels	37	Food	2	2	1	0
2021-02-02	Tuesday	Runnels	38	Food	2	2	0	0
2021-02-02	Tuesday	Runnels	39	Food	2	2	0	0
2021-02-02	Tuesday	Runnels	40	Food	3	3	0	0
2021-02-03	Wednesday	Cheaps	1	Food	3	3	1	0
2021-02-03	Wednesday	Cheaps	2	Food	1	3	0	1
2021-02-03	Wednesday	Cheaps	3	Food	3	3	1	0
2021-02-03	Wednesday	Cheaps	4	Food	1	1	1	0
2021-02-03	Wednesday	Cheaps	5	Food	2	2	1	0
2021-02-03	Wednesday	Cheaps	6	Food	3	3	1	0
2021-02-03	Wednesday	Cheaps	7	Food	2	2	1	0
2021-02-03	Wednesday	Cheaps	8	Food	2	2	1	0
2021-02-03	Wednesday	Cheaps	9	Food	1	1	1	0
2021-02-03	Wednesday	Cheaps	10	Food	3	3	1	0
2021-02-03	Wednesday	Cheaps	11	Food	3	3	1	0
2021-02-03	Wednesday	Cheaps	12	Food	2	2	1	0
2021-02-03	Wednesday	Cheaps	13	Food	2	2	1	0
2021-02-03	Wednesday	Cheaps	14	Food	3	3	1	0
2021-02-03	Wednesday	Cheaps	15	Food	1	1	1	0
2021-02-03	Wednesday	Cheaps	16	Food	3	3	1	0
2021-02-03	Wednesday	Cheaps	17	Food	3	3	1	0
2021-02-03	Wednesday	Cheaps	18	Food	3	3	1	0
2021-02-03	Wednesday	Cheaps	19	Food	3	3	1	0
2021-02-03	Wednesday	Cheaps	20	Food	3	3	1	0
2021-02-03	Wednesday	Cheaps	21	Food	1	1	1	0
2021-02-03	Wednesday	Cheaps	22	Food	3	3	1	0
2021-02-03	Wednesday	Cheaps	23	Food	1	1	1	0
2021-02-03	Wednesday	Cheaps	24	Food	2	2	1	0
2021-02-03	Wednesday	Cheaps	25	Food	2	2	1	0
2021-02-03	Wednesday	Cheaps	26	Food	3	2	0	1
2021-02-03	Wednesday	Cheaps	27	Food	3	3	1	0
2021-02-03	Wednesday	Cheaps	28	Food	2	2	1	0
2021-02-03	Wednesday	Cheaps	29	Food	2	2	1	0
2021-02-03	Wednesday	Cheaps	30	Food	3	3	1	0
2021-02-03	Wednesday	Cheaps	31	IA-3	1	1	1	0
2021-02-03	Wednesday	Cheaps	32	IA-3	3	3	1	0
2021-02-03	Wednesday	Cheaps	33	IA-3	3	3	1	0
2021-02-03	Wednesday	Cheaps	34	IA-3	2	2	1	0
2021-02-03	Wednesday	Cheaps	35	IA-3	3	3	1	0
2021-02-03	Wednesday	Cheaps	36	IA-3	1	1	1	0
2021-02-03	Wednesday	Cheaps	37	IA-3	3	2	0	1
2021-02-03	Wednesday	Cheaps	38	IA-3	2	2	1	0
2021-02-03	Wednesday	Cheaps	39	IA-3	2	2	1	0
2021-02-03	Wednesday	Cheaps	40	IA-3	1	1	1	0
2021-02-03	Wednesday	Runnels	1	Food	1	1	1	0
2021-02-03	Wednesday	Runnels	2	Food	2	2	1	0
2021-02-03	Wednesday	Runnels	3	Food	3	3	1	0
2021-02-03	Wednesday	Runnels	4	Food	2	2	1	0
2021-02-03	Wednesday	Runnels	5	Food	2	2	1	0
2021-02-03	Wednesday	Runnels	6	Food	3	3	1	0
2021-02-03	Wednesday	Runnels	7	Food	3	3	1	0
2021-02-03	Wednesday	Runnels	8	Food	3	3	1	0
2021-02-03	Wednesday	Runnels	9	Food	1	1	1	0
2021-02-03	Wednesday	Runnels	10	Food	3	3	1	0
2021-02-03	Wednesday	Runnels	11	Food	3	3	1	0
2021-02-03	Wednesday	Runnels	12	Food	2	2	1	0
2021-02-03	Wednesday	Runnels	13	Food	2	2	1	0
2021-02-03	Wednesday	Runnels	14	Food	1	1	1	0
2021-02-03	Wednesday	Runnels	15	Food	2	2	1	0
2021-02-03	Wednesday	Runnels	16	Food	1	1	1	0
2021-02-03	Wednesday	Runnels	17	Food	1	1	0	0
2021-02-03	Wednesday	Runnels	18	Food	3	3	1	0
2021-02-03	Wednesday	Runnels	19	Food	2	2	1	0
2021-02-03	Wednesday	Runnels	20	Food	2	2	1	0
2021-02-03	Wednesday	Runnels	21	Food	3	3	1	0
2021-02-03	Wednesday	Runnels	22	Food	3	3	1	0
2021-02-03	Wednesday	Runnels	23	Food	1	1	1	0
2021-02-03	Wednesday	Runnels	24	Food	3	3	1	0
2021-02-03	Wednesday	Runnels	25	Food	2	2	1	0
2021-02-03	Wednesday	Runnels	26	Food	2	2	1	0
2021-02-03	Wednesday	Runnels	27	Food	1	1	1	0
2021-02-03	Wednesday	Runnels	28	Food	1	3	0	1
2021-02-03	Wednesday	Runnels	29	No Response	3	No Response	No Response
2021-02-03	Wednesday	Runnels	30	No Response	1	No Response	No Response
2021-02-03	Wednesday	Runnels	31	No Response	1	No Response	No Response
2021-02-03	Wednesday	Runnels	32	No Response	3	No Response	No Response
2021-02-03	Wednesday	Runnels	33	No Response	1	No Response	No Response
2021-02-03	Wednesday	Runnels	34	No Response	3	No Response	No Response
2021-02-03	Wednesday	Runnels	35	No Response	1	No Response	No Response
2021-02-03	Wednesday	Runnels	36	No Response	2	No Response	No Response
2021-02-03	Wednesday	Runnels	37	No Response	3	No Response	No Response
2021-02-03	Wednesday	Runnels	38	No Response	2	No Response	No Response
2021-02-03	Wednesday	Runnels	39	No Response	2	No Response	No Response
2021-02-03	Wednesday	Runnels	40	No Response	1	No Response	No Response
2021-02-04	Thursday	Cheaps	1	Food	3	3	1	0
2021-02-04	Thursday	Cheaps	2	Food	2	2	1	0
2021-02-04	Thursday	Cheaps	3	Food	3	3	1	0
2021-02-04	Thursday	Cheaps	4	Food	1	1	1	0
2021-02-04	Thursday	Cheaps	5	Food	1	1	1	0
2021-02-04	Thursday	Cheaps	6	IA-3	2	2	1	0
2021-02-04	Thursday	Cheaps	7	IA-3	1	1	1	0
2021-02-04	Thursday	Cheaps	8	IA-3	2	1	0	1
2021-02-04	Thursday	Cheaps	9	IA-3	3	3	1	0
2021-02-04	Thursday	Cheaps	10	IA-3	1	0	0	1
2021-02-04	Thursday	Cheaps	11	Food	1	1	1	0
2021-02-04	Thursday	Cheaps	12	Food	2	2	1	0
2021-02-04	Thursday	Cheaps	13	Food	3	3	1	0
2021-02-04	Thursday	Cheaps	14	Food	1	0	0	1
2021-02-04	Thursday	Cheaps	15	Food	2	2	1	0
2021-02-04	Thursday	Cheaps	16	IA-3	1	1	1	0
2021-02-04	Thursday	Cheaps	17	IA-3	3	3	1	0
2021-02-04	Thursday	Cheaps	18	IA-3	3	3	1	0
2021-02-04	Thursday	Cheaps	19	IA-3	2	3	0	1
2021-02-04	Thursday	Cheaps	20	IA-3	2	2	1	0
2021-02-04	Thursday	Cheaps	21	IA-3	1	1	1	0
2021-02-04	Thursday	Cheaps	22	IA-3	3	3	1	0
2021-02-04	Thursday	Cheaps	23	IA-3	3	1	0	1
2021-02-04	Thursday	Cheaps	24	IA-3	1	0	0	1
2021-02-04	Thursday	Cheaps	25	IA-3	1	0	0	1
2021-02-04	Thursday	Cheaps	26	Food	2	2	1	0
2021-02-04	Thursday	Cheaps	27	Food	3	3	1	0
2021-02-04	Thursday	Cheaps	28	Food	1	1	1	0
2021-02-04	Thursday	Cheaps	29	Food	2	2	1	0
2021-02-04	Thursday	Cheaps	30	Food	1	1	1	0
2021-02-04	Thursday	Cheaps	31	IA-3	2	0	0	1
2021-02-04	Thursday	Cheaps	32	IA-3	3	3	1	0
2021-02-04	Thursday	Cheaps	33	IA-3	2	2	1	0
2021-02-04	Thursday	Cheaps	34	IA-3	3	1	0	1
2021-02-04	Thursday	Cheaps	35	IA-3	2	0	0	1
2021-02-04	Thursday	Cheaps	36	Food	3	1	0	1
2021-02-04	Thursday	Cheaps	37	Food	3	3	1	0
2021-02-04	Thursday	Cheaps	38	Food	2	2	1	0
2021-02-04	Thursday	Cheaps	39	Food	1	1	1	0
2021-02-04	Thursday	Cheaps	40	Food	3	3	1	0
2021-02-04	Thursday	Runnels	1	Food	2	2	1	0
2021-02-04	Thursday	Runnels	2	Food	1	0	1	1
2021-02-04	Thursday	Runnels	3	Food	2	2	1	0
2021-02-04	Thursday	Runnels	4	Food	3	3	1	0
2021-02-04	Thursday	Runnels	5	Food	3	3	1	0
2021-02-04	Thursday	Runnels	6	Food	3	3	1	0
2021-02-04	Thursday	Runnels	7	Food	2	2	1	0
2021-02-04	Thursday	Runnels	8	Food	1	1	1	0
2021-02-04	Thursday	Runnels	9	Food	2	2	1	0
2021-02-04	Thursday	Runnels	10	Food	3	3	1	0
2021-02-04	Thursday	Runnels	11	Food	2	2	1	0
2021-02-04	Thursday	Runnels	12	Food	2	3	0	1
2021-02-04	Thursday	Runnels	13	Food	2	2	1	0
2021-02-04	Thursday	Runnels	14	Food	1	3	0	1
2021-02-04	Thursday	Runnels	15	Food	1	1	1	0
2021-02-04	Thursday	Runnels	16	Food	2	2	1	0
2021-02-04	Thursday	Runnels	17	Food	1	1	1	0
2021-02-04	Thursday	Runnels	18	Food	2	2	1	0
2021-02-04	Thursday	Runnels	19	Food	3	3	1	0
2021-02-04	Thursday	Runnels	20	Food	2	2	1	0
2021-02-04	Thursday	Runnels	21	Food	3	3	1	0
2021-02-04	Thursday	Runnels	22	Food	2	2	1	0
2021-02-04	Thursday	Runnels	23	Food	1	1	1	0
2021-02-04	Thursday	Runnels	24	Food	3	0	0	1
2021-02-04	Thursday	Runnels	25	Food	1	1	1	0
2021-02-04	Thursday	Runnels	26	Food	2	2	1	0
2021-02-04	Thursday	Runnels	27	Food	1	2	0	1
2021-02-04	Thursday	Runnels	28	Food	3	3	1	0
2021-02-04	Thursday	Runnels	29	Food	1	1	1	0
2021-02-04	Thursday	Runnels	30	Food	1	0	0	1
2021-02-04	Thursday	Runnels	31	Food	1	1	1	0
2021-02-04	Thursday	Runnels	32	Food	1	1	1	0
2021-02-04	Thursday	Runnels	33	Food	3	3	1	0
2021-02-04	Thursday	Runnels	34	Food	3	3	1	0
2021-02-04	Thursday	Runnels	35	Food	1	0	0	1
2021-02-04	Thursday	Runnels	36	Food	3	3	1	0
2021-02-04	Thursday	Runnels	37	Food	3	3	1	0
2021-02-04	Thursday	Runnels	38	Food	2	0	0	1
2021-02-04	Thursday	Runnels	39	Food	2	2	1	0
2021-02-04	Thursday	Runnels	40	Food	2	2	1	0
2021-02-05	Friday	Cheaps	1	Food	3	3	1	0
2021-02-05	Friday	Cheaps	2	Food	3	2	0	1
2021-02-05	Friday	Cheaps	3	Food	2	2	1	0
2021-02-05	Friday	Cheaps	4	Food	2	2	1	0
2021-02-05	Friday	Cheaps	5	Food	3	3	1	0
2021-02-05	Friday	Cheaps	6	IA-3	2	1	0	1
2021-02-05	Friday	Cheaps	7	IA-3	2	0	1	1
2021-02-05	Friday	Cheaps	8	IA-3	1	1	1	0
2021-02-05	Friday	Cheaps	9	IA-3	3	0	1	1
2021-02-05	Friday	Cheaps	10	IA-3	1	0	1	1
2021-02-05	Friday	Cheaps	11	Food	1	2	0	1
2021-02-05	Friday	Cheaps	12	Food	2	0	1	1
2021-02-05	Friday	Cheaps	13	Food	3	2	1	1
2021-02-05	Friday	Cheaps	14	Food	3	3	1	0
2021-02-05	Friday	Cheaps	15	Food	1	3	1	1
2021-02-05	Friday	Cheaps	16	Food	2	1	1	1
2021-02-05	Friday	Cheaps	17	Food	2	2	1	0
2021-02-05	Friday	Cheaps	18	Food	1	2	1	1
2021-02-05	Friday	Cheaps	19	Food	3	1	1	1
2021-02-05	Friday	Cheaps	20	IA-3	1	1	1	0
2021-02-05	Friday	Cheaps	21	IA-3	1	0	1	1
2021-02-05	Friday	Cheaps	22	IA-3	2	2	1	0
2021-02-05	Friday	Cheaps	23	IA-3	3	2	0	1
2021-02-05	Friday	Cheaps	24	IA-3	1	1	1	0
2021-02-05	Friday	Cheaps	25	IA-3	2	2	1	0
2021-02-05	Friday	Cheaps	26	IA-3	2	3	0	1
2021-02-05	Friday	Cheaps	27	IA-3	1	0	1	1
2021-02-05	Friday	Cheaps	28	IA-3	2	2	1	0
2021-02-05	Friday	Cheaps	29	IA-3	2	1	0	1
2021-02-05	Friday	Cheaps	30	IA-3	3	3	1	0
2021-02-05	Friday	Cheaps	31	Food	2	2	1	0
2021-02-05	Friday	Cheaps	32	Food	3	3	1	0
2021-02-05	Friday	Cheaps	33	Food	1	1	1	0
2021-02-05	Friday	Cheaps	34	Food	2	2	1	0
2021-02-05	Friday	Cheaps	35	Food	1	1	1	0
2021-02-05	Friday	Cheaps	36	IA-3	2	0	1	1
2021-02-05	Friday	Cheaps	37	IA-3	3	0	1	1
2021-02-05	Friday	Cheaps	38	IA-3	1	0	1	1
2021-02-05	Friday	Cheaps	39	IA-3	3	0	1	1
2021-02-05	Friday	Cheaps	40	IA-3	3	0	1	1
2021-02-05	Friday	Runnels	1	Food	3	3	1	0
2021-02-05	Friday	Runnels	2	Food	2	2	1	0
2021-02-05	Friday	Runnels	3	Food	2	2	1	0
2021-02-05	Friday	Runnels	4	Food	2	2	1	0
2021-02-05	Friday	Runnels	5	Food	3	2	1	1
2021-02-05	Friday	Runnels	6	Food	1	3	1	1
2021-02-05	Friday	Runnels	7	Food	3	0	1	1
2021-02-05	Friday	Runnels	8	Food	3	0	1	1
2021-02-05	Friday	Runnels	9	Food	1	3	1	1
2021-02-05	Friday	Runnels	10	Food	3	1	1	1
2021-02-05	Friday	Runnels	11	Food	1	1	1	0
2021-02-05	Friday	Runnels	12	Food	2	2	1	0
2021-02-05	Friday	Runnels	13	Food	3	3	1	0
2021-02-05	Friday	Runnels	14	Food	1	0	1	1
2021-02-05	Friday	Runnels	15	Food	2	2	1	0
2021-02-05	Friday	Runnels	16	Food	2	2	1	0
2021-02-05	Friday	Runnels	17	Food	3	0	1	1
2021-02-05	Friday	Runnels	18	Food	1	2	0	1
2021-02-05	Friday	Runnels	19	Food	3	3	1	0
2021-02-05	Friday	Runnels	20	Food	1	3	0	1
2021-02-05	Friday	Runnels	21	Food	3	3	1	0
2021-02-05	Friday	Runnels	22	Food	2	3	0	1
2021-02-05	Friday	Runnels	23	Food	3	3	1	0
2021-02-05	Friday	Runnels	24	Food	2	2	1	0
2021-02-05	Friday	Runnels	25	Food	2	0	1	1
2021-02-05	Friday	Runnels	26	Food	1	2	0	1
2021-02-05	Friday	Runnels	27	Food	3	0	1	1
2021-02-05	Friday	Runnels	28	Food	1	0	1	1
2021-02-05	Friday	Runnels	29	Food	1	1	1	0
2021-02-05	Friday	Runnels	30	Food	2	2	1	0
2021-02-05	Friday	Runnels	31	Food	2	2	1	0
2021-02-05	Friday	Runnels	32	Food	1	2	0	1
2021-02-05	Friday	Runnels	33	Food	2	2	1	0
2021-02-05	Friday	Runnels	34	Food	3	3	1	0
2021-02-05	Friday	Runnels	35	Food	3	3	1	0
2021-02-05	Friday	Runnels	36	Food	3	3	1	0
2021-02-05	Friday	Runnels	37	Food	1	1	1	0
2021-02-05	Friday	Runnels	38	Food	3	3	1	0
2021-02-05	Friday	Runnels	39	Food	3	3	1	0
2021-02-05	Friday	Runnels	40	Food	3	3	1	0
2021-02-08	Monday	Cheaps	1	Food	1	1	1	0
2021-02-08	Monday	Cheaps	2	Food	2	2	1	0
2021-02-08	Monday	Cheaps	3	Food	1	1	1	0
2021-02-08	Monday	Cheaps	4	Food	1	1	1	0
2021-02-08	Monday	Cheaps	5	Food	3	3	1	0
2021-02-08	Monday	Cheaps	6	IA-3	2	1	0	1
2021-02-08	Monday	Cheaps	7	IA-3	3	0	1	1
2021-02-08	Monday	Cheaps	8	IA-3	1	0	1	1
2021-02-08	Monday	Cheaps	9	IA-3	3	0	1	1
2021-02-08	Monday	Cheaps	10	IA-3	3	0	1	1
2021-02-08	Monday	Cheaps	11	IA-3	2	0	1	1
2021-02-08	Monday	Cheaps	12	IA-3	3	0	1	1
2021-02-08	Monday	Cheaps	13	IA-3	1	0	1	1
2021-02-08	Monday	Cheaps	14	IA-3	2	1	0	1
2021-02-08	Monday	Cheaps	15	IA-3	3	0	1	1
2021-02-08	Monday	Cheaps	16	Food	3	2	1	1
2021-02-08	Monday	Cheaps	17	Food	2	2	1	0
2021-02-08	Monday	Cheaps	18	Food	2	2	1	0
2021-02-08	Monday	Cheaps	19	Food	2	2	1	0
2021-02-08	Monday	Cheaps	20	Food	1	1	1	0
2021-02-08	Monday	Cheaps	21	IA-3	1	0	1	1
2021-02-08	Monday	Cheaps	22	IA-3	2	0	1	1
2021-02-08	Monday	Cheaps	23	IA-3	2	0	1	1
2021-02-08	Monday	Cheaps	24	IA-3	3	0	1	1
2021-02-08	Monday	Cheaps	25	IA-3	2	0	1	1
2021-02-08	Monday	Cheaps	26	IA-3	3	2	0	1
2021-02-08	Monday	Cheaps	27	IA-3	2	2	1	0
2021-02-08	Monday	Cheaps	28	IA-3	3	0	1	1
2021-02-08	Monday	Cheaps	29	IA-3	1	0	1	1
2021-02-08	Monday	Cheaps	30	IA-3	3	2	0	1
2021-02-08	Monday	Cheaps	31	IA-3	1	1	1	0
2021-02-08	Monday	Cheaps	32	IA-3	2	3	0	1
2021-02-08	Monday	Cheaps	33	IA-3	2	2	1	0
2021-02-08	Monday	Cheaps	34	IA-3	2	0	1	1
2021-02-08	Monday	Cheaps	35	IA-3	3	2	0	1
2021-02-08	Monday	Cheaps	36	IA-3	2	1	0	1
2021-02-08	Monday	Cheaps	37	IA-3	3	3	1	0
2021-02-08	Monday	Cheaps	38	IA-3	3	2	0	1
2021-02-08	Monday	Cheaps	39	IA-3	1	1	1	0
2021-02-08	Monday	Cheaps	40	IA-3	2	3	0	1
2021-02-08	Monday	Runnels	1	Food	1	0	1	1
2021-02-08	Monday	Runnels	2	Food	3	0	1	1
2021-02-08	Monday	Runnels	3	Food	3	1	0	1
2021-02-08	Monday	Runnels	4	Food	1	1	1	0
2021-02-08	Monday	Runnels	5	Food	2	2	1	0
2021-02-08	Monday	Runnels	6	Food	3	2	0	1
2021-02-08	Monday	Runnels	7	Food	1	1	1	0
2021-02-08	Monday	Runnels	8	Food	3	3	1	0
2021-02-08	Monday	Runnels	9	Food	2	2	1	0
2021-02-08	Monday	Runnels	10	Food	2	2	1	0
2021-02-08	Monday	Runnels	11	Food	3	3	1	0
2021-02-08	Monday	Runnels	12	Food	1	1	1	0
2021-02-08	Monday	Runnels	13	Food	1	1	1	0
2021-02-08	Monday	Runnels	14	Food	3	3	1	0
2021-02-08	Monday	Runnels	15	Food	2	2	1	0
2021-02-08	Monday	Runnels	16	IA-3	2	2	1	0
2021-02-08	Monday	Runnels	17	IA-3	1	3	0	1
2021-02-08	Monday	Runnels	18	IA-3	3	3	1	0
2021-02-08	Monday	Runnels	19	IA-3	2	3	0	1
2021-02-08	Monday	Runnels	20	IA-3	1	1	1	0
2021-02-08	Monday	Runnels	21	IA-3	3	3	1	0
2021-02-08	Monday	Runnels	22	IA-3	3	2	0	1
2021-02-08	Monday	Runnels	23	IA-3	3	0	1	1
2021-02-08	Monday	Runnels	24	IA-3	1	1	1	0
2021-02-08	Monday	Runnels	25	IA-3	3	3	1	0
2021-02-08	Monday	Runnels	26	IA-3	1	2	0	1
2021-02-08	Monday	Runnels	27	IA-3	2	2	1	0
2021-02-08	Monday	Runnels	28	IA-3	2	3	0	1
2021-02-08	Monday	Runnels	29	IA-3	3	2	0	1
2021-02-08	Monday	Runnels	30	IA-3	3	0	1	1
2021-02-08	Monday	Runnels	31	IA-3	2	3	0	1
2021-02-08	Monday	Runnels	32	IA-3	3	0	1	1
2021-02-08	Monday	Runnels	33	IA-3	2	2	1	0
2021-02-08	Monday	Runnels	34	IA-3	1	2	0	1
2021-02-08	Monday	Runnels	35	IA-3	1	0	0	1
2021-02-08	Monday	Runnels	36	Food	1	0	1	1
2021-02-08	Monday	Runnels	37	Food	1	1	1	0
2021-02-08	Monday	Runnels	38	Food	1	2	0	1
2021-02-08	Monday	Runnels	39	Food	1	1	0	0
2021-02-08	Monday	Runnels	40	Food	1	1	1	0
2021-02-09	Tuesday	Cheaps	1	Food	2	0	1	1
2021-02-09	Tuesday	Cheaps	2	Food	3	3	1	0
2021-02-09	Tuesday	Cheaps	3	Food	2	2	1	0
2021-02-09	Tuesday	Cheaps	4	Food	3	3	1	0
2021-02-09	Tuesday	Cheaps	5	Food	1	1	1	0
2021-02-09	Tuesday	Cheaps	6	IA-3	3	3	1	0
2021-02-09	Tuesday	Cheaps	7	IA-3	2	0	1	1
2021-02-09	Tuesday	Cheaps	8	IA-3	3	0	1	1
2021-02-09	Tuesday	Cheaps	9	IA-3	2	2	1	0
2021-02-09	Tuesday	Cheaps	10	IA-3	3	3	1	0
2021-02-09	Tuesday	Cheaps	11	IA-3	2	2	1	0
2021-02-09	Tuesday	Cheaps	12	IA-3	3	0	1	1
2021-02-09	Tuesday	Cheaps	13	IA-3	1	0	1	1
2021-02-09	Tuesday	Cheaps	14	IA-3	1	0	1	1
2021-02-09	Tuesday	Cheaps	15	IA-3	3	3	1	0
2021-02-09	Tuesday	Cheaps	16	IA-3	1	0	1	1
2021-02-09	Tuesday	Cheaps	17	IA-3	3	0	1	1
2021-02-09	Tuesday	Cheaps	18	IA-3	3	0	1	1
2021-02-09	Tuesday	Cheaps	19	IA-3	2	No Response	No Response
2021-02-09	Tuesday	Cheaps	20	IA-3	1	No Response	No Response
2021-02-09	Tuesday	Cheaps	21	IA-3	3	No Response	No Response
2021-02-09	Tuesday	Cheaps	22	IA-3	3	No Response	No Response
2021-02-09	Tuesday	Cheaps	23	IA-3	1	No Response	No Response
2021-02-09	Tuesday	Cheaps	24	IA-3	1	No Response	No Response
2021-02-09	Tuesday	Cheaps	25	IA-3	1	No Response	No Response
2021-02-09	Tuesday	Cheaps	26	IA-3	1	No Response	No Response
2021-02-09	Tuesday	Cheaps	27	IA-3	3	No Response	No Response
2021-02-09	Tuesday	Cheaps	28	IA-3	3	No Response	No Response
2021-02-09	Tuesday	Cheaps	29	IA-3	2	No Response	No Response
2021-02-09	Tuesday	Cheaps	30	IA-3	3	No Response	No Response
2021-02-09	Tuesday	Cheaps	31	IA-3	1	No Response	No Response
2021-02-09	Tuesday	Cheaps	32	IA-3	1	No Response	No Response
2021-02-09	Tuesday	Cheaps	33	IA-3	3	No Response	No Response
2021-02-09	Tuesday	Cheaps	34	IA-3	1	No Response	No Response
2021-02-09	Tuesday	Cheaps	35	IA-3	2	No Response	No Response
2021-02-09	Tuesday	Cheaps	36	IA-3	2	No Response	No Response
2021-02-09	Tuesday	Cheaps	37	IA-3	2	No Response	No Response
2021-02-09	Tuesday	Cheaps	38	IA-3	1	No Response	No Response
2021-02-09	Tuesday	Cheaps	39	IA-3	2	No Response	No Response
2021-02-09	Tuesday	Cheaps	40	IA-3	3	No Response	No Response
2021-02-09	Tuesday	Runnels	1	Food	2	2	1	0
2021-02-09	Tuesday	Runnels	2	Food	1	1	1	0
2021-02-09	Tuesday	Runnels	3	Food	2	0	0	1
2021-02-09	Tuesday	Runnels	4	Food	1	0	1	1
2021-02-09	Tuesday	Runnels	5	Food	1	1	1	0
2021-02-09	Tuesday	Runnels	6	Food	1	1	1	0
2021-02-09	Tuesday	Runnels	7	Food	3	0	1	1
2021-02-09	Tuesday	Runnels	8	Food	3	3	1	0
2021-02-09	Tuesday	Runnels	9	Food	1	1	1	0
2021-02-09	Tuesday	Runnels	10	Food	1	1	1	0
2021-02-09	Tuesday	Runnels	11	IA-3	1	1	1	0
2021-02-09	Tuesday	Runnels	12	IA-3	1	1	1	0
2021-02-09	Tuesday	Runnels	13	IA-3	2	2	1	0
2021-02-09	Tuesday	Runnels	14	IA-3	1	1	1	0
2021-02-09	Tuesday	Runnels	15	IA-3	3	3	1	0
2021-02-09	Tuesday	Runnels	16	IA-3	3	3	1	0
2021-02-09	Tuesday	Runnels	17	IA-3	1	1	1	0
2021-02-09	Tuesday	Runnels	18	IA-3	3	0	1	1
2021-02-09	Tuesday	Runnels	19	IA-3	3	3	1	0
2021-02-09	Tuesday	Runnels	20	IA-3	1	1	1	0
2021-02-09	Tuesday	Runnels	21	IA-3	2	2	1	0
2021-02-09	Tuesday	Runnels	22	IA-3	1	1	1	0
2021-02-09	Tuesday	Runnels	23	IA-3	3	3	1	0
2021-02-09	Tuesday	Runnels	24	IA-3	2	0	0	1
2021-02-09	Tuesday	Runnels	25	IA-3	1	0	1	1
2021-02-09	Tuesday	Runnels	26	IA-3	3	3	1	0
2021-02-09	Tuesday	Runnels	27	IA-3	2	2	1	0
2021-02-09	Tuesday	Runnels	28	IA-3	2	2	1	0
2021-02-09	Tuesday	Runnels	29	IA-3	3	3	1	0
2021-02-09	Tuesday	Runnels	30	IA-3	3	3	1	0
2021-02-09	Tuesday	Runnels	31	IA-3	1	1	1	0
2021-02-09	Tuesday	Runnels	32	IA-3	1	0	1	1
2021-02-09	Tuesday	Runnels	33	IA-3	1	0	1	1
2021-02-09	Tuesday	Runnels	34	IA-3	1	0	1	1
2021-02-09	Tuesday	Runnels	35	IA-3	3	0	1	1
2021-02-09	Tuesday	Runnels	36	IA-3	3	0	1	1
2021-02-09	Tuesday	Runnels	37	IA-3	3	0	1	1
2021-02-09	Tuesday	Runnels	38	IA-3	3	0	1	1
2021-02-09	Tuesday	Runnels	39	IA-3	1	1	1	0
2021-02-09	Tuesday	Runnels	40	IA-3	2	2	1	0
2021-02-10	Wednesday	Cheaps	1	Food	2	3	0	1
2021-02-10	Wednesday	Cheaps	2	Food	1	0	0	1
2021-02-10	Wednesday	Cheaps	3	Food	3	3	1	0
2021-02-10	Wednesday	Cheaps	4	Food	3	3	1	0
2021-02-10	Wednesday	Cheaps	5	Food	1	1	1	0
2021-02-10	Wednesday	Cheaps	6	Food	3	3	1	0
2021-02-10	Wednesday	Cheaps	7	Food	2	2	1	0
2021-02-10	Wednesday	Cheaps	8	Food	2	2	1	0
2021-02-10	Wednesday	Cheaps	9	Food	3	3	1	0
2021-02-10	Wednesday	Cheaps	10	Food	1	1	1	0
2021-02-10	Wednesday	Cheaps	11	IA-3	3	2	0	1
2021-02-10	Wednesday	Cheaps	12	IA-3	3	3	1	0
2021-02-10	Wednesday	Cheaps	13	IA-3	3	3	1	0
2021-02-10	Wednesday	Cheaps	14	IA-3	2	0	0	1
2021-02-10	Wednesday	Cheaps	15	IA-3	3	3	1	0
2021-02-10	Wednesday	Cheaps	16	Food	3	3	1	0
2021-02-10	Wednesday	Cheaps	17	Food	2	2	1	0
2021-02-10	Wednesday	Cheaps	18	Food	1	1	1	0
2021-02-10	Wednesday	Cheaps	19	Food	1	1	1	0
2021-02-10	Wednesday	Cheaps	20	Food	1	1	1	0
2021-02-10	Wednesday	Cheaps	21	IA-3	3	3	1	0
2021-02-10	Wednesday	Cheaps	22	IA-3	1	1	1	0
2021-02-10	Wednesday	Cheaps	23	IA-3	3	3	1	0
2021-02-10	Wednesday	Cheaps	24	IA-3	1	0	0	1
2021-02-10	Wednesday	Cheaps	25	IA-3	1	0	0	1
2021-02-10	Wednesday	Cheaps	26	IA-3	2	0	0	1
2021-02-10	Wednesday	Cheaps	27	IA-3	2	2	1	0
2021-02-10	Wednesday	Cheaps	28	IA-3	2	2	1	0
2021-02-10	Wednesday	Cheaps	29	IA-3	2	2	1	0
2021-02-10	Wednesday	Cheaps	30	IA-3	2	3	0	1
2021-02-10	Wednesday	Cheaps	31	IA-3	1	2	0	1
2021-02-10	Wednesday	Cheaps	32	IA-3	1	0	0	1
2021-02-10	Wednesday	Cheaps	33	IA-3	1	1	1	0
2021-02-10	Wednesday	Cheaps	34	IA-3	3	1	0	1
2021-02-10	Wednesday	Cheaps	35	IA-3	2	2	1	0
2021-02-10	Wednesday	Cheaps	36	IA-3	1	1	1	0
2021-02-10	Wednesday	Cheaps	37	IA-3	2	0	0	1
2021-02-10	Wednesday	Cheaps	38	IA-3	2	2	1	0
2021-02-10	Wednesday	Cheaps	39	IA-3	1	0	0	1
2021-02-10	Wednesday	Cheaps	40	IA-3	1	1	1	0
2021-02-10	Wednesday	Runnels	1	Food	3	3	1	0
2021-02-10	Wednesday	Runnels	2	Food	2	2	1	0
2021-02-10	Wednesday	Runnels	3	Food	3	3	1	0
2021-02-10	Wednesday	Runnels	4	Food	2	2	1	0
2021-02-10	Wednesday	Runnels	5	Food	1	1	1	0
2021-02-10	Wednesday	Runnels	6	Food	2	2	1	0
2021-02-10	Wednesday	Runnels	7	Food	1	2	0	1
2021-02-10	Wednesday	Runnels	8	Food	3	3	1	0
2021-02-10	Wednesday	Runnels	9	Food	3	3	1	0
2021-02-10	Wednesday	Runnels	10	Food	3	3	1	0
2021-02-10	Wednesday	Runnels	11	IA-3	2	3	0	1
2021-02-10	Wednesday	Runnels	12	IA-3	1	1	1	0
2021-02-10	Wednesday	Runnels	13	IA-3	1	3	0	1
2021-02-10	Wednesday	Runnels	14	IA-3	2	2	1	0
2021-02-10	Wednesday	Runnels	15	IA-3	2	2	1	0
2021-02-10	Wednesday	Runnels	16	IA-3	3	3	1	0
2021-02-10	Wednesday	Runnels	17	IA-3	1	2	0	1
2021-02-10	Wednesday	Runnels	18	IA-3	3	2	0	1
2021-02-10	Wednesday	Runnels	19	IA-3	3	3	1	0
2021-02-10	Wednesday	Runnels	20	IA-3	1	3	0	1
2021-02-10	Wednesday	Runnels	21	IA-3	2	3	0	1
2021-02-10	Wednesday	Runnels	22	IA-3	2	2	1	0
2021-02-10	Wednesday	Runnels	23	IA-3	2	3	0	1
2021-02-10	Wednesday	Runnels	24	IA-3	2	2	1	0
2021-02-10	Wednesday	Runnels	25	IA-3	1	3	0	1
2021-02-10	Wednesday	Runnels	26	IA-3	1	1	1	0
2021-02-10	Wednesday	Runnels	27	IA-3	2	2	1	0
2021-02-10	Wednesday	Runnels	28	IA-3	2	2	1	0
2021-02-10	Wednesday	Runnels	29	IA-3	3	3	1	0
2021-02-10	Wednesday	Runnels	30	IA-3	1	3	0	1
2021-02-10	Wednesday	Runnels	31	IA-3	2	3	0	1
2021-02-10	Wednesday	Runnels	32	IA-3	1	1	1	0
2021-02-10	Wednesday	Runnels	33	IA-3	2	2	1	0
2021-02-10	Wednesday	Runnels	34	IA-3	2	2	1	0
2021-02-10	Wednesday	Runnels	35	IA-3	1	1	1	0
2021-02-10	Wednesday	Runnels	36	IA-3	1	3	0	1
2021-02-10	Wednesday	Runnels	37	IA-3	3	2	0	1
2021-02-10	Wednesday	Runnels	38	IA-3	2	2	1	0
2021-02-10	Wednesday	Runnels	39	IA-3	2	3	0	1
2021-02-10	Wednesday	Runnels	40	IA-3	3	3	1	0
2021-02-11	Thursday	Cheaps	1	Food	3	3	1	0
2021-02-11	Thursday	Cheaps	2	Food	1	1	1	0
2021-02-11	Thursday	Cheaps	3	Food	3	3	1	0
2021-02-11	Thursday	Cheaps	4	Food	3	3	1	0
2021-02-11	Thursday	Cheaps	5	Food	1	1	1	0
2021-02-11	Thursday	Cheaps	6	IA-3	2	3	0	1
2021-02-11	Thursday	Cheaps	7	IA-3	2	2	1	0
2021-02-11	Thursday	Cheaps	8	IA-3	3	2	0	1
2021-02-11	Thursday	Cheaps	9	IA-3	2	2	1	0
2021-02-11	Thursday	Cheaps	10	IA-3	1	2	0	1
2021-02-11	Thursday	Cheaps	11	Food	1	1	1	0
2021-02-11	Thursday	Cheaps	12	Food	3	3	1	0
2021-02-11	Thursday	Cheaps	13	Food	1	1	1	0
2021-02-11	Thursday	Cheaps	14	Food	3	3	1	0
2021-02-11	Thursday	Cheaps	15	Food	1	1	1	0
2021-02-11	Thursday	Cheaps	16	IA-3	2	1	0	1
2021-02-11	Thursday	Cheaps	17	IA-3	1	3	0	1
2021-02-11	Thursday	Cheaps	18	IA-3	1	0	1	1
2021-02-11	Thursday	Cheaps	19	IA-3	3	3	1	0
2021-02-11	Thursday	Cheaps	20	IA-3	2	0	1	1
2021-02-11	Thursday	Cheaps	21	Food	3	3	1	0
2021-02-11	Thursday	Cheaps	22	Food	1	3	0	1
2021-02-11	Thursday	Cheaps	23	Food	3	3	1	0
2021-02-11	Thursday	Cheaps	24	Food	1	1	1	0
2021-02-11	Thursday	Cheaps	25	Food	1	1	1	0
2021-02-11	Thursday	Cheaps	26	IA-3	1	0	1	1
2021-02-11	Thursday	Cheaps	27	IA-3	1	2	0	1
2021-02-11	Thursday	Cheaps	28	IA-3	3	3	1	0
2021-02-11	Thursday	Cheaps	29	IA-3	2	3	0	1
2021-02-11	Thursday	Cheaps	30	IA-3	2	2	1	0
2021-02-11	Thursday	Cheaps	31	IA-3	2	3	0	1
2021-02-11	Thursday	Cheaps	32	IA-3	3	3	1	0
2021-02-11	Thursday	Cheaps	33	IA-3	1	1	1	0
2021-02-11	Thursday	Cheaps	34	IA-3	2	3	0	1
2021-02-11	Thursday	Cheaps	35	IA-3	2	2	1	0
2021-02-11	Thursday	Cheaps	36	IA-3	2	3	0	1
2021-02-11	Thursday	Cheaps	37	IA-3	2	2	1	0
2021-02-11	Thursday	Cheaps	38	IA-3	3	3	1	0
2021-02-11	Thursday	Cheaps	39	IA-3	1	2	0	1
2021-02-11	Thursday	Cheaps	40	IA-3	3	2	0	1
2021-02-11	Thursday	Runnels	1	Food	2	2	0	0
2021-02-11	Thursday	Runnels	2	Food	2	0	1	1
2021-02-11	Thursday	Runnels	3	Food	3	3	1	0
2021-02-11	Thursday	Runnels	4	Food	2	3	1	1
2021-02-11	Thursday	Runnels	5	Food	3	1	1	1
2021-02-11	Thursday	Runnels	6	IA-3	3	3	1	0
2021-02-11	Thursday	Runnels	7	IA-3	2	3	0	1
2021-02-11	Thursday	Runnels	8	IA-3	2	1	0	1
2021-02-11	Thursday	Runnels	9	IA-3	2	0	1	1
2021-02-11	Thursday	Runnels	10	IA-3	3	2	0	1
2021-02-11	Thursday	Runnels	11	Food	2	3	1	1
2021-02-11	Thursday	Runnels	12	Food	2	3	1	1
2021-02-11	Thursday	Runnels	13	Food	2	2	1	0
2021-02-11	Thursday	Runnels	14	Food	1	0	1	1
2021-02-11	Thursday	Runnels	15	Food	3	3	1	0
2021-02-11	Thursday	Runnels	16	IA-3	3	0	1	1
2021-02-11	Thursday	Runnels	17	IA-3	1	2	1	1
2021-02-11	Thursday	Runnels	18	IA-3	3	3	0	0
2021-02-11	Thursday	Runnels	19	IA-3	1	2	1	1
2021-02-11	Thursday	Runnels	20	IA-3	3	2	0	1
2021-02-11	Thursday	Runnels	21	Food	3	2	0	1
2021-02-11	Thursday	Runnels	22	Food	1	3	0	1
2021-02-11	Thursday	Runnels	23	Food	3	0	1	1
2021-02-11	Thursday	Runnels	24	Food	2	2	0	0
2021-02-11	Thursday	Runnels	25	Food	2	1	0	1
2021-02-11	Thursday	Runnels	26	Food	1	2	1	1
2021-02-11	Thursday	Runnels	27	Food	1	3	1	1
2021-02-11	Thursday	Runnels	28	Food	3	2	1	1
2021-02-11	Thursday	Runnels	29	Food	2	2	1	0
2021-02-11	Thursday	Runnels	30	Food	2	2	1	0
2021-02-11	Thursday	Runnels	31	IA-3	2	0	1	1
2021-02-11	Thursday	Runnels	32	IA-3	1	2	1	1
2021-02-11	Thursday	Runnels	33	IA-3	1	1	1	0
2021-02-11	Thursday	Runnels	34	IA-3	3	2	0	1
2021-02-11	Thursday	Runnels	35	IA-3	3	2	0	1
2021-02-11	Thursday	Runnels	36	IA-3	1	3	1	1
2021-02-11	Thursday	Runnels	37	IA-3	1	2	1	1
2021-02-11	Thursday	Runnels	38	IA-3	1	3	1	1
2021-02-11	Thursday	Runnels	39	IA-3	1	3	0	1
2021-02-11	Thursday	Runnels	40	IA-3	1	0	1	1
2021-02-12	Friday	Cheaps	1	Food	2	2	1	0
2021-02-12	Friday	Cheaps	2	Food	3	3	1	0
2021-02-12	Friday	Cheaps	3	Food	3	3	1	0
2021-02-12	Friday	Cheaps	4	Food	1	1	1	0
2021-02-12	Friday	Cheaps	5	Food	1	1	1	0
2021-02-12	Friday	Cheaps	6	IA-3	1	3	0	1
2021-02-12	Friday	Cheaps	7	IA-3	3	2	0	1
2021-02-12	Friday	Cheaps	8	IA-3	1	1	1	0
2021-02-12	Friday	Cheaps	9	IA-3	3	3	1	0
2021-02-12	Friday	Cheaps	10	IA-3	2	2	1	0
2021-02-12	Friday	Cheaps	11	IA-3	1	1	1	0
2021-02-12	Friday	Cheaps	12	IA-3	2	3	0	1
2021-02-12	Friday	Cheaps	13	IA-3	3	3	1	0
2021-02-12	Friday	Cheaps	14	IA-3	3	2	0	1
2021-02-12	Friday	Cheaps	15	IA-3	1	3	0	1
2021-02-12	Friday	Cheaps	16	IA-3	2	2	1	0
2021-02-12	Friday	Cheaps	17	IA-3	2	3	0	1
2021-02-12	Friday	Cheaps	18	IA-3	1	3	0	1
2021-02-12	Friday	Cheaps	19	IA-3	3	0	0	1
2021-02-12	Friday	Cheaps	20	IA-3	3	3	1	0
2021-02-12	Friday	Cheaps	21	Food	2	3	0	1
2021-02-12	Friday	Cheaps	22	Food	1	0	1	1
2021-02-12	Friday	Cheaps	23	Food	3	3	1	0
2021-02-12	Friday	Cheaps	24	Food	1	1	1	0
2021-02-12	Friday	Cheaps	25	Food	1	2	0	1
2021-02-12	Friday	Cheaps	26	Food	1	1	1	0
2021-02-12	Friday	Cheaps	27	Food	1	1	1	0
2021-02-12	Friday	Cheaps	28	Food	1	1	1	0
2021-02-12	Friday	Cheaps	29	Food	2	2	1	0
2021-02-12	Friday	Cheaps	30	Food	2	2	1	0
2021-02-12	Friday	Cheaps	31	IA-3	3	3	1	0
2021-02-12	Friday	Cheaps	32	IA-3	1	3	0	1
2021-02-12	Friday	Cheaps	33	IA-3	3	3	1	0
2021-02-12	Friday	Cheaps	34	IA-3	2	2	1	0
2021-02-12	Friday	Cheaps	35	IA-3	2	1	0	1
2021-02-12	Friday	Cheaps	36	IA-3	2	1	0	1
2021-02-12	Friday	Cheaps	37	IA-3	3	3	1	0
2021-02-12	Friday	Cheaps	38	IA-3	2	2	1	0
2021-02-12	Friday	Cheaps	39	IA-3	1	3	0	1
2021-02-12	Friday	Cheaps	40	IA-3	2	3	0	1
2021-02-12	Friday	Runnels	1	Food	1	1	1	0
2021-02-12	Friday	Runnels	2	Food	2	2	1	0
2021-02-12	Friday	Runnels	3	Food	1	1	1	0
2021-02-12	Friday	Runnels	4	Food	2	2	1	0
2021-02-12	Friday	Runnels	5	Food	2	3	0	1
2021-02-12	Friday	Runnels	6	IA-3	1	2	0	1
2021-02-12	Friday	Runnels	7	IA-3	1	2	0	1
2021-02-12	Friday	Runnels	8	IA-3	2	2	1	0
2021-02-12	Friday	Runnels	9	IA-3	1	0	1	1
2021-02-12	Friday	Runnels	10	IA-3	1	1	1	0
2021-02-12	Friday	Runnels	11	IA-3	2	2	1	0
2021-02-12	Friday	Runnels	12	IA-3	3	2	0	1
2021-02-12	Friday	Runnels	13	IA-3	2	2	1	0
2021-02-12	Friday	Runnels	14	IA-3	2	3	0	1
2021-02-12	Friday	Runnels	15	IA-3	1	2	0	1
2021-02-12	Friday	Runnels	16	IA-3	2	2	1	0
2021-02-12	Friday	Runnels	17	IA-3	2	3	0	1
2021-02-12	Friday	Runnels	18	IA-3	2	2	1	0
2021-02-12	Friday	Runnels	19	IA-3	2	3	0	1
2021-02-12	Friday	Runnels	20	IA-3	1	2	1	1
2021-02-12	Friday	Runnels	21	IA-3	3	3	1	0
2021-02-12	Friday	Runnels	22	IA-3	3	3	1	0
2021-02-12	Friday	Runnels	23	IA-3	3	2	0	1
2021-02-12	Friday	Runnels	24	IA-3	2	3	0	1
2021-02-12	Friday	Runnels	25	IA-3	2	2	1	0
2021-02-12	Friday	Runnels	26	IA-3	2	3	0	1
2021-02-12	Friday	Runnels	27	IA-3	3	3	1	0
2021-02-12	Friday	Runnels	28	IA-3	2	2	1	0
2021-02-12	Friday	Runnels	29	IA-3	2	2	1	0
2021-02-12	Friday	Runnels	30	IA-3	1	3	1	1
2021-02-12	Friday	Runnels	31	IA-3	1	2	0	1
2021-02-12	Friday	Runnels	32	IA-3	2	2	1	0
2021-02-12	Friday	Runnels	33	IA-3	2	2	1	0
2021-02-12	Friday	Runnels	34	IA-3	2	0	1	1
2021-02-12	Friday	Runnels	35	IA-3	2	3	0	1
2021-02-12	Friday	Runnels	36	IA-3	3	3	1	0
2021-02-12	Friday	Runnels	37	IA-3	2	3	0	1
2021-02-12	Friday	Runnels	38	IA-3	1	3	0	1
2021-02-12	Friday	Runnels	39	IA-3	2	3	0	1
2021-02-12	Friday	Runnels	40	IA-3	3	3	1	0
2021-02-22	Monday	Cheaps	1	Food	1	1	1	0
2021-02-22	Monday	Cheaps	2	Food	2	2	1	0
2021-02-22	Monday	Cheaps	3	Food	2	2	1	0
2021-02-22	Monday	Cheaps	4	Food	1	1	1	0
2021-02-22	Monday	Cheaps	5	Food	2	2	1	0
2021-02-22	Monday	Cheaps	6	IA-3	1	1	1	0
2021-02-22	Monday	Cheaps	7	IA-3	3	0	1	1
2021-02-22	Monday	Cheaps	8	IA-3	1	1	1	0
2021-02-22	Monday	Cheaps	9	IA-3	2	2	1	0
2021-02-22	Monday	Cheaps	10	IA-3	3	2	0	1
2021-02-22	Monday	Cheaps	11	IA-3	3	2	0	1
2021-02-22	Monday	Cheaps	12	IA-3	2	3	0	1
2021-02-22	Monday	Cheaps	13	IA-3	3	2	0	1
2021-02-22	Monday	Cheaps	14	IA-3	2	2	0	0
2021-02-22	Monday	Cheaps	15	IA-3	3	3	1	0
2021-02-22	Monday	Cheaps	16	Food	2	3	0	1
2021-02-22	Monday	Cheaps	17	Food	2	2	1	0
2021-02-22	Monday	Cheaps	18	Food	1	1	1	0
2021-02-22	Monday	Cheaps	19	Food	3	3	1	0
2021-02-22	Monday	Cheaps	20	Food	3	3	1	0
2021-02-22	Monday	Cheaps	21	Food	2	2	1	0
2021-02-22	Monday	Cheaps	22	IA-3	2	2	1	0
2021-02-22	Monday	Cheaps	23	IA-3	3	2	0	1
2021-02-22	Monday	Cheaps	24	IA-3	1	2	0	1
2021-02-22	Monday	Cheaps	25	IA-3	2	1	0	1
2021-02-22	Monday	Cheaps	26	IA-3	1	2	0	1
2021-02-22	Monday	Cheaps	27	Food	2	2	1	0
2021-02-22	Monday	Cheaps	28	Food	3	3	1	0
2021-02-22	Monday	Cheaps	29	Food	2	2	1	0
2021-02-22	Monday	Cheaps	30	Food	1	1	1	0
2021-02-22	Monday	Cheaps	31	IA-3	2	2	1	0
2021-02-22	Monday	Cheaps	32	IA-3	3	1	0	1
2021-02-22	Monday	Cheaps	33	IA-3	2	1	0	1
2021-02-22	Monday	Cheaps	34	IA-3	1	2	0	1
2021-02-22	Monday	Cheaps	35	IA-3	2	1	0	1
2021-02-22	Monday	Cheaps	36	Food	2	2	1	0
2021-02-22	Monday	Cheaps	37	Food	3	3	1	0
2021-02-22	Monday	Cheaps	38	Food	2	2	1	0
2021-02-22	Monday	Cheaps	39	Food	2	2	1	0
2021-02-22	Monday	Cheaps	40	Food	1	1	1	0
2021-02-22	Monday	Runnels	1	Food	2	2	1	0
2021-02-22	Monday	Runnels	2	Food	3	3	1	0
2021-02-22	Monday	Runnels	3	Food	2	3	0	1
2021-02-22	Monday	Runnels	4	Food	3	3	1	0
2021-02-22	Monday	Runnels	5	Food	1	2	0	1
2021-02-22	Monday	Runnels	6	Food	1	1	1	0
2021-02-22	Monday	Runnels	7	Food	2	2	1	0
2021-02-22	Monday	Runnels	8	Food	1	1	1	0
2021-02-22	Monday	Runnels	9	Food	1	2	0	1
2021-02-22	Monday	Runnels	10	Food	1	3	0	1
2021-02-22	Monday	Runnels	11	Food	2	2	1	0
2021-02-22	Monday	Runnels	12	Food	1	2	0	1
2021-02-22	Monday	Runnels	13	Food	3	2	0	1
2021-02-22	Monday	Runnels	14	Food	1	1	0	0
2021-02-22	Monday	Runnels	15	Food	2	2	1	0
2021-02-22	Monday	Runnels	16	Food	3	3	1	0
2021-02-22	Monday	Runnels	17	Food	2	2	1	0
2021-02-22	Monday	Runnels	18	Food	1	1	1	0
2021-02-22	Monday	Runnels	19	Food	2	2	1	0
2021-02-22	Monday	Runnels	20	Food	1	3	0	1
2021-02-22	Monday	Runnels	21	IA-3	1	1	1	0
2021-02-22	Monday	Runnels	22	IA-3	2	2	1	0
2021-02-22	Monday	Runnels	23	IA-3	3	2	0	1
2021-02-22	Monday	Runnels	24	IA-3	1	1	0	0
2021-02-22	Monday	Runnels	25	IA-3	3	1	0	1
2021-02-22	Monday	Runnels	26	Food	1	2	0	1
2021-02-22	Monday	Runnels	27	Food	3	3	1	0
2021-02-22	Monday	Runnels	28	Food	3	3	1	0
2021-02-22	Monday	Runnels	29	Food	1	1	1	0
2021-02-22	Monday	Runnels	30	Food	1	2	0	1
2021-02-22	Monday	Runnels	31	Food	2	2	1	0
2021-02-22	Monday	Runnels	32	Food	3	3	1	0
2021-02-22	Monday	Runnels	33	Food	1	2	0	1
2021-02-22	Monday	Runnels	34	Food	1	1	0	0
2021-02-22	Monday	Runnels	35	Food	1	3	0	1
2021-02-22	Monday	Runnels	36	Food	2	2	1	0
2021-02-22	Monday	Runnels	37	Food	2	2	1	0
2021-02-22	Monday	Runnels	38	Food	1	2	0	1
2021-02-22	Monday	Runnels	39	Food	2	2	1	0
2021-02-22	Monday	Runnels	40	Food	2	2	1	0
2021-02-23	Tuesday	Cheaps	1	Food	1	1	1	0
2021-02-23	Tuesday	Cheaps	2	Food	2	2	1	0
2021-02-23	Tuesday	Cheaps	3	Food	2	3	0	1
2021-02-23	Tuesday	Cheaps	4	Food	1	1	1	0
2021-02-23	Tuesday	Cheaps	5	Food	1	1	1	0
2021-02-23	Tuesday	Cheaps	6	IA-3	1	2	0	1
2021-02-23	Tuesday	Cheaps	7	IA-3	2	3	0	1
2021-02-23	Tuesday	Cheaps	8	IA-3	3	0	0	1
2021-02-23	Tuesday	Cheaps	9	IA-3	3	0	0	1
2021-02-23	Tuesday	Cheaps	10	IA-3	2	2	1	0
2021-02-23	Tuesday	Cheaps	11	IA-3	3	3	1	0
2021-02-23	Tuesday	Cheaps	12	IA-3	2	3	0	1
2021-02-23	Tuesday	Cheaps	13	IA-3	3	2	0	1
2021-02-23	Tuesday	Cheaps	14	IA-3	3	3	1	0
2021-02-23	Tuesday	Cheaps	15	IA-3	3	2	1	1
2021-02-23	Tuesday	Cheaps	16	IA-3	2	2	1	0
2021-02-23	Tuesday	Cheaps	17	IA-3	1	1	1	0
2021-02-23	Tuesday	Cheaps	18	IA-3	1	3	0	1
2021-02-23	Tuesday	Cheaps	19	IA-3	1	2	0	1
2021-02-23	Tuesday	Cheaps	20	IA-3	1	1	1	0
2021-02-23	Tuesday	Cheaps	21	IA-3	2	1	0	1
2021-02-23	Tuesday	Cheaps	22	IA-3	2	3	0	1
2021-02-23	Tuesday	Cheaps	23	IA-3	3	0	0	1
2021-02-23	Tuesday	Cheaps	24	IA-3	2	3	0	1
2021-02-23	Tuesday	Cheaps	25	IA-3	2	2	1	0
2021-02-23	Tuesday	Cheaps	26	IA-3	1	0	0	1
2021-02-23	Tuesday	Cheaps	27	IA-3	1	2	0	1
2021-02-23	Tuesday	Cheaps	28	IA-3	2	2	1	0
2021-02-23	Tuesday	Cheaps	29	IA-3	3	3	1	0
2021-02-23	Tuesday	Cheaps	30	IA-3	3	1	0	1
2021-02-23	Tuesday	Cheaps	31	IA-3	2	3	0	1
2021-02-23	Tuesday	Cheaps	32	IA-3	3	3	1	0
2021-02-23	Tuesday	Cheaps	33	IA-3	3	2	0	1
2021-02-23	Tuesday	Cheaps	34	IA-3	3	3	1	0
2021-02-23	Tuesday	Cheaps	35	IA-3	2	2	1	0
2021-02-23	Tuesday	Cheaps	36	IA-3	2	3	1	1
2021-02-23	Tuesday	Cheaps	37	IA-3	1	1	1	0
2021-02-23	Tuesday	Cheaps	38	IA-3	2	2	1	0
2021-02-23	Tuesday	Cheaps	39	IA-3	3	2	0	1
2021-02-23	Tuesday	Cheaps	40	IA-3	2	3	0	1
2021-02-23	Tuesday	Runnels	1	Food	3	3	1	0
2021-02-23	Tuesday	Runnels	2	Food	1	3	0	1
2021-02-23	Tuesday	Runnels	3	Food	3	3	0	0
2021-02-23	Tuesday	Runnels	4	Food	3	3	1	0
2021-02-23	Tuesday	Runnels	5	Food	3	3	1	0
2021-02-23	Tuesday	Runnels	6	Food	2	2	1	0
2021-02-23	Tuesday	Runnels	7	Food	3	1	0	1
2021-02-23	Tuesday	Runnels	8	Food	2	2	1	0
2021-02-23	Tuesday	Runnels	9	Food	2	2	1	0
2021-02-23	Tuesday	Runnels	10	Food	2	2	1	0
2021-02-23	Tuesday	Runnels	11	IA-3	1	3	0	1
2021-02-23	Tuesday	Runnels	12	IA-3	3	3	1	0
2021-02-23	Tuesday	Runnels	13	IA-3	1	1	1	0
2021-02-23	Tuesday	Runnels	14	IA-3	3	3	1	0
2021-02-23	Tuesday	Runnels	15	IA-3	1	2	0	1
2021-02-23	Tuesday	Runnels	16	IA-3	2	2	1	0
2021-02-23	Tuesday	Runnels	17	IA-3	3	2	0	1
2021-02-23	Tuesday	Runnels	18	IA-3	1	1	1	0
2021-02-23	Tuesday	Runnels	19	IA-3	3	3	1	0
2021-02-23	Tuesday	Runnels	20	IA-3	1	0	0	1
2021-02-23	Tuesday	Runnels	21	IA-3	3	3	1	0
2021-02-23	Tuesday	Runnels	22	IA-3	2	2	1	0
2021-02-23	Tuesday	Runnels	23	IA-3	1	2	0	1
2021-02-23	Tuesday	Runnels	24	IA-3	3	2	0	1
2021-02-23	Tuesday	Runnels	25	IA-3	1	1	1	0
2021-02-23	Tuesday	Runnels	26	IA-3	1	1	1	0
2021-02-23	Tuesday	Runnels	27	IA-3	3	2	0	1
2021-02-23	Tuesday	Runnels	28	IA-3	1	1	1	0
2021-02-23	Tuesday	Runnels	29	IA-3	3	2	0	1
2021-02-23	Tuesday	Runnels	30	IA-3	2	2	1	0
2021-02-23	Tuesday	Runnels	31	IA-3	3	2	0	1
2021-02-23	Tuesday	Runnels	32	IA-3	2	2	1	0
2021-02-23	Tuesday	Runnels	33	IA-3	2	1	0	1
2021-02-23	Tuesday	Runnels	34	IA-3	1	3	0	1
2021-02-23	Tuesday	Runnels	35	IA-3	2	2	1	0
2021-02-23	Tuesday	Runnels	36	IA-3	1	2	0	1
2021-02-23	Tuesday	Runnels	37	IA-3	2	2	1	0
2021-02-23	Tuesday	Runnels	38	IA-3	1	2	0	1
2021-02-23	Tuesday	Runnels	39	IA-3	3	3	1	0
2021-02-23	Tuesday	Runnels	40	IA-3	2	2	1	0
2021-02-24	Wednesday	Cheaps	1	Food	3	3	1	0
2021-02-24	Wednesday	Cheaps	2	Food	3	3	1	0
2021-02-24	Wednesday	Cheaps	3	Food	3	3	1	0
2021-02-24	Wednesday	Cheaps	4	Food	2	2	1	0
2021-02-24	Wednesday	Cheaps	5	Food	2	2	1	0
2021-02-24	Wednesday	Cheaps	6	IA-3	2	1	0	1
2021-02-24	Wednesday	Cheaps	7	IA-3	1	2	0	1
2021-02-24	Wednesday	Cheaps	8	IA-3	3	2	0	1
2021-02-24	Wednesday	Cheaps	9	IA-3	1	3	0	1
2021-02-24	Wednesday	Cheaps	10	IA-3	1	0	0	1
2021-02-24	Wednesday	Cheaps	11	IA-3	1	1	1	0
2021-02-24	Wednesday	Cheaps	12	IA-3	3	3	1	0
2021-02-24	Wednesday	Cheaps	13	IA-3	3	3	1	0
2021-02-24	Wednesday	Cheaps	14	IA-3	1	2	0	1
2021-02-24	Wednesday	Cheaps	15	IA-3	1	2	0	1
2021-02-24	Wednesday	Cheaps	16	IA-3	3	3	1	0
2021-02-24	Wednesday	Cheaps	17	IA-3	2	2	1	0
2021-02-24	Wednesday	Cheaps	18	IA-3	1	2	0	1
2021-02-24	Wednesday	Cheaps	19	IA-3	1	2	0	1
2021-02-24	Wednesday	Cheaps	20	IA-3	2	2	1	0
2021-02-24	Wednesday	Cheaps	21	IA-3	1	1	1	0
2021-02-24	Wednesday	Cheaps	22	IA-3	2	2	1	0
2021-02-24	Wednesday	Cheaps	23	IA-3	1	0	0	1
2021-02-24	Wednesday	Cheaps	24	IA-3	3	3	1	0
2021-02-24	Wednesday	Cheaps	25	IA-3	3	2	0	1
2021-02-24	Wednesday	Cheaps	26	IA-3	1	3	0	1
2021-02-24	Wednesday	Cheaps	27	IA-3	3	2	0	1
2021-02-24	Wednesday	Cheaps	28	IA-3	1	2	0	1
2021-02-24	Wednesday	Cheaps	29	IA-3	2	2	1	0
2021-02-24	Wednesday	Cheaps	30	IA-3	1	2	0	1
2021-02-24	Wednesday	Cheaps	31	Food	1	1	1	0
2021-02-24	Wednesday	Cheaps	32	Food	3	3	1	0
2021-02-24	Wednesday	Cheaps	33	Food	1	1	1	0
2021-02-24	Wednesday	Cheaps	34	Food	1	1	1	0
2021-02-24	Wednesday	Cheaps	35	Food	3	3	1	0
2021-02-24	Wednesday	Cheaps	36	IA-3	3	3	1	0
2021-02-24	Wednesday	Cheaps	37	IA-3	2	3	0	1
2021-02-24	Wednesday	Cheaps	38	IA-3	2	2	1	0
2021-02-24	Wednesday	Cheaps	39	IA-3	2	2	1	0
2021-02-24	Wednesday	Cheaps	40	IA-3	1	1	1	0
2021-02-24	Wednesday	Runnels	1	IA-3	1	3	0	1
2021-02-24	Wednesday	Runnels	2	IA-3	2	2	1	0
2021-02-24	Wednesday	Runnels	3	IA-3	2	2	1	0
2021-02-24	Wednesday	Runnels	4	IA-3	2	3	0	1
2021-02-24	Wednesday	Runnels	5	IA-3	3	2	0	1
2021-02-24	Wednesday	Runnels	6	IA-3	2	2	1	0
2021-02-24	Wednesday	Runnels	7	IA-3	3	3	1	0
2021-02-24	Wednesday	Runnels	8	IA-3	3	3	1	0
2021-02-24	Wednesday	Runnels	9	IA-3	1	2	0	1
2021-02-24	Wednesday	Runnels	10	IA-3	3	3	1	0
2021-02-24	Wednesday	Runnels	11	IA-3	2	3	0	1
2021-02-24	Wednesday	Runnels	12	IA-3	3	3	1	0
2021-02-24	Wednesday	Runnels	13	IA-3	1	2	0	1
2021-02-24	Wednesday	Runnels	14	IA-3	2	3	0	1
2021-02-24	Wednesday	Runnels	15	IA-3	3	3	1	0
2021-02-24	Wednesday	Runnels	16	IA-3	3	3	1	0
2021-02-24	Wednesday	Runnels	17	IA-3	1	2	0	1
2021-02-24	Wednesday	Runnels	18	IA-3	3	3	1	0
2021-02-24	Wednesday	Runnels	19	IA-3	1	1	1	0
2021-02-24	Wednesday	Runnels	20	IA-3	3	2	0	1
2021-02-24	Wednesday	Runnels	21	IA-3	3	2	0	1
2021-02-24	Wednesday	Runnels	22	IA-3	1	3	0	1
2021-02-24	Wednesday	Runnels	23	IA-3	1	3	0	1
2021-02-24	Wednesday	Runnels	24	IA-3	3	2	0	1
2021-02-24	Wednesday	Runnels	25	IA-3	3	3	1	0
2021-02-24	Wednesday	Runnels	26	IA-3	2	3	0	1
2021-02-24	Wednesday	Runnels	27	IA-3	1	3	0	1
2021-02-24	Wednesday	Runnels	28	IA-3	3	2	0	1
2021-02-24	Wednesday	Runnels	29	IA-3	1	1	1	0
2021-02-24	Wednesday	Runnels	30	IA-3	2	3	0	1
2021-02-24	Wednesday	Runnels	31	IA-3	2	3	0	1
2021-02-24	Wednesday	Runnels	32	IA-3	3	3	1	0
2021-02-24	Wednesday	Runnels	33	IA-3	1	1	1	0
2021-02-24	Wednesday	Runnels	34	IA-3	1	0	1	1
2021-02-24	Wednesday	Runnels	35	IA-3	2	2	1	0
2021-02-24	Wednesday	Runnels	36	IA-3	1	2	0	1
2021-02-24	Wednesday	Runnels	37	IA-3	2	3	0	1
2021-02-24	Wednesday	Runnels	38	IA-3	1	1	1	0
2021-02-24	Wednesday	Runnels	39	IA-3	1	3	0	1
2021-02-24	Wednesday	Runnels	40	IA-3	2	2	1	0
2021-02-25	Thursday	Cheaps	1	Food	2	2	1	0
2021-02-25	Thursday	Cheaps	2	Food	3	3	1	0
2021-02-25	Thursday	Cheaps	3	Food	1	1	1	0
2021-02-25	Thursday	Cheaps	4	Food	2	2	1	0
2021-02-25	Thursday	Cheaps	5	Food	3	3	1	0
2021-02-25	Thursday	Cheaps	6	IA-3	2	3	0	1
2021-02-25	Thursday	Cheaps	7	IA-3	2	2	1	0
2021-02-25	Thursday	Cheaps	8	IA-3	3	2	0	1
2021-02-25	Thursday	Cheaps	9	IA-3	2	3	0	1
2021-02-25	Thursday	Cheaps	10	IA-3	1	2	0	1
2021-02-25	Thursday	Cheaps	11	IA-3	2	0	1	1
2021-02-25	Thursday	Cheaps	12	IA-3	1	2	0	1
2021-02-25	Thursday	Cheaps	13	IA-3	3	3	1	0
2021-02-25	Thursday	Cheaps	14	IA-3	3	2	0	1
2021-02-25	Thursday	Cheaps	15	IA-3	3	0	1	1
2021-02-25	Thursday	Cheaps	16	IA-3	1	1	1	0
2021-02-25	Thursday	Cheaps	17	IA-3	3	2	0	1
2021-02-25	Thursday	Cheaps	18	IA-3	3	0	1	1
2021-02-25	Thursday	Cheaps	19	IA-3	1	2	0	1
2021-02-25	Thursday	Cheaps	20	IA-3	1	3	0	1
2021-02-25	Thursday	Cheaps	21	IA-3	1	1	1	0
2021-02-25	Thursday	Cheaps	22	IA-3	3	2	0	1
2021-02-25	Thursday	Cheaps	23	IA-3	3	3	1	0
2021-02-25	Thursday	Cheaps	24	IA-3	1	0	1	1
2021-02-25	Thursday	Cheaps	25	IA-3	2	2	1	0
2021-02-25	Thursday	Cheaps	26	IA-3	1	2	0	1
2021-02-25	Thursday	Cheaps	27	IA-3	3	3	1	0
2021-02-25	Thursday	Cheaps	28	IA-3	2	0	1	1
2021-02-25	Thursday	Cheaps	29	IA-3	1	2	0	1
2021-02-25	Thursday	Cheaps	30	IA-3	2	1	0	1
2021-02-25	Thursday	Cheaps	31	IA-3	3	0	1	1
2021-02-25	Thursday	Cheaps	32	IA-3	2	3	0	1
2021-02-25	Thursday	Cheaps	33	IA-3	1	1	1	0
2021-02-25	Thursday	Cheaps	34	IA-3	3	3	1	0
2021-02-25	Thursday	Cheaps	35	IA-3	3	2	0	1
2021-02-25	Thursday	Cheaps	36	IA-3	3	0	1	1
2021-02-25	Thursday	Cheaps	37	IA-3	1	0	1	1
2021-02-25	Thursday	Cheaps	38	IA-3	1	2	0	1
2021-02-25	Thursday	Cheaps	39	IA-3	2	2	1	0
2021-02-25	Thursday	Cheaps	40	IA-3	1	2	0	1
2021-02-25	Thursday	Runnels	1	IA-3	3	3	1	0
2021-02-25	Thursday	Runnels	2	IA-3	2	2	1	0
2021-02-25	Thursday	Runnels	3	IA-3	2	2	1	0
2021-02-25	Thursday	Runnels	4	IA-3	1	3	0	1
2021-02-25	Thursday	Runnels	5	IA-3	1	3	0	1
2021-02-25	Thursday	Runnels	6	IA-3	3	3	1	0
2021-02-25	Thursday	Runnels	7	IA-3	1	1	0	0
2021-02-25	Thursday	Runnels	8	IA-3	3	3	1	0
2021-02-25	Thursday	Runnels	9	IA-3	3	3	1	0
2021-02-25	Thursday	Runnels	10	IA-3	2	3	0	1
2021-02-25	Thursday	Runnels	11	IA-3	3	3	1	0
2021-02-25	Thursday	Runnels	12	IA-3	3	3	1	0
2021-02-25	Thursday	Runnels	13	IA-3	1	1	1	0
2021-02-25	Thursday	Runnels	14	IA-3	1	2	0	1
2021-02-25	Thursday	Runnels	15	IA-3	1	1	1	0
2021-02-25	Thursday	Runnels	16	IA-3	2	3	0	1
2021-02-25	Thursday	Runnels	17	IA-3	1	1	1	0
2021-02-25	Thursday	Runnels	18	IA-3	2	2	1	0
2021-02-25	Thursday	Runnels	19	IA-3	2	1	0	1
2021-02-25	Thursday	Runnels	20	IA-3	1	2	0	1
2021-02-25	Thursday	Runnels	21	IA-3	2	2	1	0
2021-02-25	Thursday	Runnels	22	IA-3	1	1	1	0
2021-02-25	Thursday	Runnels	23	IA-3	1	3	0	1
2021-02-25	Thursday	Runnels	24	IA-3	3	3	1	0
2021-02-25	Thursday	Runnels	25	IA-3	3	3	1	0
2021-02-25	Thursday	Runnels	26	IA-3	2	2	1	0
2021-02-25	Thursday	Runnels	27	IA-3	2	2	1	0
2021-02-25	Thursday	Runnels	28	IA-3	3	3	1	0
2021-02-25	Thursday	Runnels	29	IA-3	2	2	1	0
2021-02-25	Thursday	Runnels	30	IA-3	3	2	1	1
2021-02-25	Thursday	Runnels	31	IA-3	3	3	1	0
2021-02-25	Thursday	Runnels	32	IA-3	1	3	0	1
2021-02-25	Thursday	Runnels	33	IA-3	2	2	1	0
2021-02-25	Thursday	Runnels	34	IA-3	1	2	0	1
2021-02-25	Thursday	Runnels	35	IA-3	1	2	0	1
2021-02-25	Thursday	Runnels	36	IA-3	2	2	1	0
2021-02-25	Thursday	Runnels	37	IA-3	3	3	1	0
2021-02-25	Thursday	Runnels	38	IA-3	1	3	0	1
2021-02-25	Thursday	Runnels	39	IA-3	1	1	1	0
2021-02-25	Thursday	Runnels	40	IA-3	3	2	0	1
2021-02-26	Friday	Cheaps	1	IA-3	1	3	0	1
2021-02-26	Friday	Cheaps	2	IA-3	3	3	1	0
2021-02-26	Friday	Cheaps	3	IA-3	1	3	0	1
2021-02-26	Friday	Cheaps	4	IA-3	2	2	1	0
2021-02-26	Friday	Cheaps	5	IA-3	3	3	1	0
2021-02-26	Friday	Cheaps	6	IA-3	1	2	0	1
2021-02-26	Friday	Cheaps	7	IA-3	1	2	0	1
2021-02-26	Friday	Cheaps	8	IA-3	1	3	0	1
2021-02-26	Friday	Cheaps	9	IA-3	2	2	1	0
2021-02-26	Friday	Cheaps	10	IA-3	1	3	0	1
2021-02-26	Friday	Cheaps	11	IA-3	1	1	1	0
2021-02-26	Friday	Cheaps	12	IA-3	3	1	0	1
2021-02-26	Friday	Cheaps	13	IA-3	1	2	0	1
2021-02-26	Friday	Cheaps	14	IA-3	2	3	0	1
2021-02-26	Friday	Cheaps	15	IA-3	2	2	1	0
2021-02-26	Friday	Cheaps	16	IA-3	1	3	0	1
2021-02-26	Friday	Cheaps	17	IA-3	3	3	1	0
2021-02-26	Friday	Cheaps	18	IA-3	1	1	1	0
2021-02-26	Friday	Cheaps	19	IA-3	3	1	0	1
2021-02-26	Friday	Cheaps	20	IA-3	1	2	0	1
2021-02-26	Friday	Cheaps	21	IA-3	2	2	1	0
2021-02-26	Friday	Cheaps	22	IA-3	2	3	0	1
2021-02-26	Friday	Cheaps	23	IA-3	1	2	0	1
2021-02-26	Friday	Cheaps	24	IA-3	1	2	0	1
2021-02-26	Friday	Cheaps	25	IA-3	3	1	0	1
2021-02-26	Friday	Cheaps	26	IA-3	3	3	1	0
2021-02-26	Friday	Cheaps	27	IA-3	3	2	0	1
2021-02-26	Friday	Cheaps	28	IA-3	2	2	1	0
2021-02-26	Friday	Cheaps	29	IA-3	3	3	1	0
2021-02-26	Friday	Cheaps	30	IA-3	2	2	1	0
2021-02-26	Friday	Cheaps	31	IA-3	1	3	0	1
2021-02-26	Friday	Cheaps	32	IA-3	2	3	0	1
2021-02-26	Friday	Cheaps	33	IA-3	2	2	1	0
2021-02-26	Friday	Cheaps	34	IA-3	2	3	0	1
2021-02-26	Friday	Cheaps	35	IA-3	1	3	0	1
2021-02-26	Friday	Cheaps	36	IA-3	3	2	0	1
2021-02-26	Friday	Cheaps	37	IA-3	1	2	0	1
2021-02-26	Friday	Cheaps	38	IA-3	1	2	0	1
2021-02-26	Friday	Cheaps	39	IA-3	1	2	0	1
2021-02-26	Friday	Cheaps	40	IA-3	1	1	1	0
2021-02-26	Friday	Runnels	1	IA-3	3	3	1	0
2021-02-26	Friday	Runnels	2	IA-3	2	3	0	1
2021-02-26	Friday	Runnels	3	IA-3	3	3	1	0
2021-02-26	Friday	Runnels	4	IA-3	2	2	1	0
2021-02-26	Friday	Runnels	5	IA-3	1	2	0	1
2021-02-26	Friday	Runnels	6	IA-3	2	2	1	0
2021-02-26	Friday	Runnels	7	IA-3	1	1	1	0
2021-02-26	Friday	Runnels	8	IA-3	1	3	0	1
2021-02-26	Friday	Runnels	9	IA-3	1	3	0	1
2021-02-26	Friday	Runnels	10	IA-3	1	1	1	0
2021-02-26	Friday	Runnels	11	IA-3	1	1	1	0
2021-02-26	Friday	Runnels	12	IA-3	2	2	1	0
2021-02-26	Friday	Runnels	13	IA-3	2	2	1	0
2021-02-26	Friday	Runnels	14	IA-3	1	3	0	1
2021-02-26	Friday	Runnels	15	IA-3	1	3	0	1
2021-02-26	Friday	Runnels	16	IA-3	3	3	1	0
2021-02-26	Friday	Runnels	17	IA-3	2	2	1	0
2021-02-26	Friday	Runnels	18	IA-3	3	3	1	0
2021-02-26	Friday	Runnels	19	IA-3	1	1	1	0
2021-02-26	Friday	Runnels	20	IA-3	1	1	1	0
2021-02-26	Friday	Runnels	21	IA-3	3	3	1	0
2021-02-26	Friday	Runnels	22	IA-3	1	3	0	1
2021-02-26	Friday	Runnels	23	IA-3	2	3	0	1
2021-02-26	Friday	Runnels	24	IA-3	2	3	0	1
2021-02-26	Friday	Runnels	25	IA-3	2	2	1	0
2021-02-26	Friday	Runnels	26	IA-3	2	3	1	1
2021-02-26	Friday	Runnels	27	IA-3	3	3	0	0
2021-02-26	Friday	Runnels	28	IA-3	1	2	1	1
2021-02-26	Friday	Runnels	29	IA-3	2	2	0	0
2021-02-26	Friday	Runnels	30	IA-3	1	1	1	0
2021-02-26	Friday	Runnels	31	IA-3	1	1	1	0
2021-02-26	Friday	Runnels	32	IA-3	2	3	0	1
2021-02-26	Friday	Runnels	33	IA-3	2	2	1	0
2021-02-26	Friday	Runnels	34	IA-3	3	2	0	1
2021-02-26	Friday	Runnels	35	IA-3	3	2	0	1
2021-02-26	Friday	Runnels	36	IA-3	1	1	1	0
2021-02-26	Friday	Runnels	37	IA-3	3	3	1	0
2021-02-26	Friday	Runnels	38	IA-3	1	1	1	0
2021-02-26	Friday	Runnels	39	IA-3	3	2	0	1
2021-02-26	Friday	Runnels	40	IA-3	1	3	0	1
2021-03-01	Monday	Cheaps	1	IA-4	2	2	0	0
2021-03-01	Monday	Cheaps	2	IA-4	3	1	0	1
2021-03-01	Monday	Cheaps	3	IA-4	1	1	1	0
2021-03-01	Monday	Cheaps	4	IA-4	2	2	1	0
2021-03-01	Monday	Cheaps	5	IA-4	1	2	0	1
2021-03-01	Monday	Cheaps	6	IA-4	2	2	1	0
2021-03-01	Monday	Cheaps	7	IA-4	3	3	1	0
2021-03-01	Monday	Cheaps	8	IA-4	1	2	0	1
2021-03-01	Monday	Cheaps	9	IA-4	3	2	0	1
2021-03-01	Monday	Cheaps	10	IA-4	1	1	1	0
2021-03-01	Monday	Cheaps	11	IA-4	3	2	0	1
2021-03-01	Monday	Cheaps	12	IA-4	1	2	0	1
2021-03-01	Monday	Cheaps	13	IA-4	1	2	0	1
2021-03-01	Monday	Cheaps	14	IA-4	2	3	0	1
2021-03-01	Monday	Cheaps	15	IA-4	1	3	0	1
2021-03-01	Monday	Cheaps	16	Food	3	3	1	0
2021-03-01	Monday	Cheaps	17	Food	1	1	1	0
2021-03-01	Monday	Cheaps	18	Food	2	2	1	0
2021-03-01	Monday	Cheaps	19	Food	2	2	1	0
2021-03-01	Monday	Cheaps	20	Food	2	2	1	0
2021-03-01	Monday	Cheaps	21	IA-4	1	2	0	1
2021-03-01	Monday	Cheaps	22	IA-4	2	2	1	0
2021-03-01	Monday	Cheaps	23	IA-4	2	3	0	1
2021-03-01	Monday	Cheaps	24	IA-4	2	2	1	0
2021-03-01	Monday	Cheaps	25	IA-4	3	3	1	0
2021-03-01	Monday	Cheaps	26	IA-4	3	2	0	1
2021-03-01	Monday	Cheaps	27	IA-4	1	1	1	0
2021-03-01	Monday	Cheaps	28	IA-4	2	3	0	1
2021-03-01	Monday	Cheaps	29	IA-4	1	3	0	1
2021-03-01	Monday	Cheaps	30	IA-4	1	2	0	1
2021-03-01	Monday	Cheaps	31	IA-4	2	3	0	1
2021-03-01	Monday	Cheaps	32	IA-4	3	3	1	0
2021-03-01	Monday	Cheaps	33	IA-4	1	2	0	1
2021-03-01	Monday	Cheaps	34	IA-4	1	1	1	0
2021-03-01	Monday	Cheaps	35	IA-4	1	3	0	1
2021-03-01	Monday	Cheaps	36	Food	3	3	1	0
2021-03-01	Monday	Cheaps	37	Food	2	2	1	0
2021-03-01	Monday	Cheaps	38	Food	2	2	1	0
2021-03-01	Monday	Cheaps	39	Food	2	2	1	0
2021-03-01	Monday	Cheaps	40	Food	1	1	1	0
2021-03-01	Monday	Runnels	1	IA-4	2	3	0	1
2021-03-01	Monday	Runnels	2	IA-4	2	1	0	1
2021-03-01	Monday	Runnels	3	IA-4	1	1	1	0
2021-03-01	Monday	Runnels	4	IA-4	3	3	1	0
2021-03-01	Monday	Runnels	5	IA-4	2	2	1	0
2021-03-01	Monday	Runnels	6	IA-4	2	2	1	0
2021-03-01	Monday	Runnels	7	IA-4	3	2	0	1
2021-03-01	Monday	Runnels	8	IA-4	3	3	1	0
2021-03-01	Monday	Runnels	9	IA-4	3	2	0	1
2021-03-01	Monday	Runnels	10	IA-4	1	3	0	1
2021-03-01	Monday	Runnels	11	IA-4	3	2	0	1
2021-03-01	Monday	Runnels	12	IA-4	1	3	0	1
2021-03-01	Monday	Runnels	13	IA-4	3	2	0	1
2021-03-01	Monday	Runnels	14	IA-4	2	3	0	1
2021-03-01	Monday	Runnels	15	IA-4	2	3	0	1
2021-03-01	Monday	Runnels	16	Food	3	3	1	0
2021-03-01	Monday	Runnels	17	Food	2	2	1	0
2021-03-01	Monday	Runnels	18	Food	3	3	1	0
2021-03-01	Monday	Runnels	19	Food	2	2	1	0
2021-03-01	Monday	Runnels	20	Food	2	2	1	0
2021-03-01	Monday	Runnels	21	IA-4	1	1	1	0
2021-03-01	Monday	Runnels	22	IA-4	1	1	1	0
2021-03-01	Monday	Runnels	23	IA-4	1	2	0	1
2021-03-01	Monday	Runnels	24	IA-4	1	2	0	1
2021-03-01	Monday	Runnels	25	IA-4	1	1	1	0
2021-03-01	Monday	Runnels	26	IA-4	3	2	0	1
2021-03-01	Monday	Runnels	27	IA-4	3	3	1	0
2021-03-01	Monday	Runnels	28	IA-4	3	3	1	0
2021-03-01	Monday	Runnels	29	IA-4	2	2	1	0
2021-03-01	Monday	Runnels	30	IA-4	3	3	1	0
2021-03-01	Monday	Runnels	31	IA-4	3	3	1	0
2021-03-01	Monday	Runnels	32	IA-4	3	3	1	0
2021-03-01	Monday	Runnels	33	IA-4	1	1	1	0
2021-03-01	Monday	Runnels	34	IA-4	2	2	1	0
2021-03-01	Monday	Runnels	35	IA-4	2	1	0	1
2021-03-01	Monday	Runnels	36	IA-4	2	2	1	0
2021-03-01	Monday	Runnels	37	IA-4	2	2	1	0
2021-03-01	Monday	Runnels	38	IA-4	1	1	1	0
2021-03-01	Monday	Runnels	39	IA-4	1	1	1	0
2021-03-01	Monday	Runnels	40	IA-4	3	2	0	1
2021-03-02	Tuesday	Cheaps	1	IA-4	2	2	1	0
2021-03-02	Tuesday	Cheaps	2	IA-4	3	3	1	0
2021-03-02	Tuesday	Cheaps	3	IA-4	1	0	0	1
2021-03-02	Tuesday	Cheaps	4	IA-4	1	0	1	1
2021-03-02	Tuesday	Cheaps	5	IA-4	1	0	0	1
2021-03-02	Tuesday	Cheaps	6	IA-4	3	0	0	1
2021-03-02	Tuesday	Cheaps	7	IA-4	2	0	1	1
2021-03-02	Tuesday	Cheaps	8	IA-4	1	0	0	1
2021-03-02	Tuesday	Cheaps	9	IA-4	3	0	0	1
2021-03-02	Tuesday	Cheaps	10	IA-4	2	2	1	0
2021-03-02	Tuesday	Cheaps	11	IA-4	2	0	0	1
2021-03-02	Tuesday	Cheaps	12	IA-4	2	2	1	0
2021-03-02	Tuesday	Cheaps	13	IA-4	2	2	1	0
2021-03-02	Tuesday	Cheaps	14	IA-4	1	0	0	1
2021-03-02	Tuesday	Cheaps	15	IA-4	3	0	1	1
2021-03-02	Tuesday	Cheaps	16	IA-4	3	3	1	0
2021-03-02	Tuesday	Cheaps	17	IA-4	2	2	1	0
2021-03-02	Tuesday	Cheaps	18	IA-4	2	2	1	0
2021-03-02	Tuesday	Cheaps	19	IA-4	2	2	1	0
2021-03-02	Tuesday	Cheaps	20	IA-4	3	0	0	1
2021-03-02	Tuesday	Cheaps	21	IA-4	1	0	0	1
2021-03-02	Tuesday	Cheaps	22	IA-4	3	0	0	1
2021-03-02	Tuesday	Cheaps	23	IA-4	1	0	1	1
2021-03-02	Tuesday	Cheaps	24	IA-4	2	2	1	0
2021-03-02	Tuesday	Cheaps	25	IA-4	3	0	0	1
2021-03-02	Tuesday	Cheaps	26	IA-4	3	0	0	1
2021-03-02	Tuesday	Cheaps	27	IA-4	1	0	0	1
2021-03-02	Tuesday	Cheaps	28	IA-4	1	0	1	1
2021-03-02	Tuesday	Cheaps	29	IA-4	2	2	1	0
2021-03-02	Tuesday	Cheaps	30	IA-4	2	2	1	0
2021-03-02	Tuesday	Cheaps	31	IA-4	1	0	0	1
2021-03-02	Tuesday	Cheaps	32	IA-4	3	0	0	1
2021-03-02	Tuesday	Cheaps	33	IA-4	1	0	0	1
2021-03-02	Tuesday	Cheaps	34	IA-4	2	2	1	0
2021-03-02	Tuesday	Cheaps	35	IA-4	2	2	1	0
2021-03-02	Tuesday	Cheaps	36	IA-4	2	2	1	0
2021-03-02	Tuesday	Cheaps	37	IA-4	1	1	1	0
2021-03-02	Tuesday	Cheaps	38	IA-4	2	2	1	0
2021-03-02	Tuesday	Cheaps	39	IA-4	2	2	1	0
2021-03-02	Tuesday	Cheaps	40	IA-4	3	0	0	1
2021-03-02	Tuesday	Runnels	1	IA-4	1	0	0	1
2021-03-02	Tuesday	Runnels	2	IA-4	1	0	0	1
2021-03-02	Tuesday	Runnels	3	IA-4	2	2	1	0
2021-03-02	Tuesday	Runnels	4	IA-4	3	3	1	0
2021-03-02	Tuesday	Runnels	5	IA-4	1	0	0	1
2021-03-02	Tuesday	Runnels	6	IA-4	3	0	1	1
2021-03-02	Tuesday	Runnels	7	IA-4	3	3	1	0
2021-03-02	Tuesday	Runnels	8	IA-4	2	0	0	1
2021-03-02	Tuesday	Runnels	9	IA-4	1	0	0	1
2021-03-02	Tuesday	Runnels	10	IA-4	2	0	0	1
2021-03-02	Tuesday	Runnels	11	IA-4	1	1	1	0
2021-03-02	Tuesday	Runnels	12	IA-4	2	2	1	0
2021-03-02	Tuesday	Runnels	13	IA-4	3	3	1	0
2021-03-02	Tuesday	Runnels	14	IA-4	1	1	1	0
2021-03-02	Tuesday	Runnels	15	IA-4	2	2	1	0
2021-03-02	Tuesday	Runnels	16	IA-4	3	0	0	1
2021-03-02	Tuesday	Runnels	17	IA-4	2	0	0	1
2021-03-02	Tuesday	Runnels	18	IA-4	2	2	1	0
2021-03-02	Tuesday	Runnels	19	IA-4	3	0	0	1
2021-03-02	Tuesday	Runnels	20	IA-4	1	0	0	1
2021-03-02	Tuesday	Runnels	21	IA-4	2	2	1	0
2021-03-02	Tuesday	Runnels	22	IA-4	1	1	1	0
2021-03-02	Tuesday	Runnels	23	IA-4	3	3	1	0
2021-03-02	Tuesday	Runnels	24	IA-4	2	2	1	0
2021-03-02	Tuesday	Runnels	25	IA-4	1	1	1	0
2021-03-02	Tuesday	Runnels	26	IA-4	1	1	1	0
2021-03-02	Tuesday	Runnels	27	IA-4	1	1	1	0
2021-03-02	Tuesday	Runnels	28	IA-4	3	0	0	1
2021-03-02	Tuesday	Runnels	29	IA-4	3	0	0	1
2021-03-02	Tuesday	Runnels	30	IA-4	1	1	1	0
2021-03-02	Tuesday	Runnels	31	IA-4	1	1	1	0
2021-03-02	Tuesday	Runnels	32	IA-4	3	3	1	0
2021-03-02	Tuesday	Runnels	33	IA-4	1	0	1	1
2021-03-02	Tuesday	Runnels	34	IA-4	1	1	1	0
2021-03-02	Tuesday	Runnels	35	IA-4	3	0	0	1
2021-03-02	Tuesday	Runnels	36	IA-4	3	0	0	1
2021-03-02	Tuesday	Runnels	37	IA-4	1	1	1	0
2021-03-02	Tuesday	Runnels	38	IA-4	3	3	1	0
2021-03-02	Tuesday	Runnels	39	IA-4	1	1	1	0
2021-03-02	Tuesday	Runnels	40	IA-4	2	2	1	0
2021-03-03	Wednesday	Cheaps	1	IA-4	2	2	1	0
2021-03-03	Wednesday	Cheaps	2	IA-4	2	2	1	0
2021-03-03	Wednesday	Cheaps	3	IA-4	1	2	3	1
2021-03-03	Wednesday	Cheaps	4	IA-4	2	2	1	0
2021-03-03	Wednesday	Cheaps	5	IA-4	3	2	4	1
2021-03-03	Wednesday	Cheaps	6	IA-4	3	3	1	0
2021-03-03	Wednesday	Cheaps	7	IA-4	3	2	2	1
2021-03-03	Wednesday	Cheaps	8	IA-4	3	2	6	1
2021-03-03	Wednesday	Cheaps	9	IA-4	2	3	3	1
2021-03-03	Wednesday	Cheaps	10	IA-4	3	3	1	0
2021-03-03	Wednesday	Cheaps	11	IA-4	1	2	9	1
2021-03-03	Wednesday	Cheaps	12	IA-4	3	3	1	0
2021-03-03	Wednesday	Cheaps	13	IA-4	2	3	2	1
2021-03-03	Wednesday	Cheaps	14	IA-4	1	1	1	0
2021-03-03	Wednesday	Cheaps	15	IA-4	2	2	1	0
2021-03-03	Wednesday	Cheaps	16	IA-4	2	2	1	0
2021-03-03	Wednesday	Cheaps	17	IA-4	1	2	8	1
2021-03-03	Wednesday	Cheaps	18	IA-4	2	2	1	0
2021-03-03	Wednesday	Cheaps	19	IA-4	1	2	8	1
2021-03-03	Wednesday	Cheaps	20	IA-4	1	2	6	1
2021-03-03	Wednesday	Cheaps	21	IA-4	2	2	1	0
2021-03-03	Wednesday	Cheaps	22	IA-4	1	2	4	1
2021-03-03	Wednesday	Cheaps	23	IA-4	1	2	0	1
2021-03-03	Wednesday	Cheaps	24	IA-4	2	0	0	1
2021-03-03	Wednesday	Cheaps	25	Food	2	2	1	0
2021-03-03	Wednesday	Cheaps	26	Food	1	1	1	0
2021-03-03	Wednesday	Cheaps	27	Food	1	1	1	0
2021-03-03	Wednesday	Cheaps	28	Food	1	1	1	0
2021-03-03	Wednesday	Cheaps	29	Food	1	1	1	0
2021-03-03	Wednesday	Cheaps	30	IA-4	1	2	0	1
2021-03-03	Wednesday	Cheaps	31	IA-4	2	1	0	1
2021-03-03	Wednesday	Cheaps	32	IA-4	1	1	1	0
2021-03-03	Wednesday	Cheaps	33	IA-4	3	2	0	1
2021-03-03	Wednesday	Cheaps	34	IA-4	3	3	1	0
2021-03-03	Wednesday	Cheaps	35	IA-4	2	2	1	0
2021-03-03	Wednesday	Cheaps	36	IA-4	2	2	1	0
2021-03-03	Wednesday	Cheaps	37	IA-4	2	2	1	0
2021-03-03	Wednesday	Cheaps	38	IA-4	2	2	1	0
2021-03-03	Wednesday	Cheaps	39	IA-4	3	2	0	1
2021-03-03	Wednesday	Cheaps	40	IA-4	1	1	1	0
2021-03-03	Wednesday	Runnels	1	IA-4	3	3	1	0
2021-03-03	Wednesday	Runnels	2	IA-4	1	1	1	0
2021-03-03	Wednesday	Runnels	3	IA-4	2	1	1	1
2021-03-03	Wednesday	Runnels	4	IA-4	3	1	0	1
2021-03-03	Wednesday	Runnels	5	IA-4	2	1	0	1
2021-03-03	Wednesday	Runnels	6	IA-4	3	3	1	0
2021-03-03	Wednesday	Runnels	7	IA-4	2	2	1	0
2021-03-03	Wednesday	Runnels	8	IA-4	2	1	0	1
2021-03-03	Wednesday	Runnels	9	IA-4	1	1	1	0
2021-03-03	Wednesday	Runnels	10	IA-4	2	2	1	0
2021-03-03	Wednesday	Runnels	11	IA-4	1	3	1	1
2021-03-03	Wednesday	Runnels	12	IA-4	1	1	1	0
2021-03-03	Wednesday	Runnels	13	IA-4	3	1	1	1
2021-03-03	Wednesday	Runnels	14	IA-4	2	2	1	0
2021-03-03	Wednesday	Runnels	15	IA-4	3	1	0	1
2021-03-03	Wednesday	Runnels	16	IA-4	1	1	1	0
2021-03-03	Wednesday	Runnels	17	IA-4	3	1	1	1
2021-03-03	Wednesday	Runnels	18	IA-4	2	1	1	1
2021-03-03	Wednesday	Runnels	19	IA-4	3	3	1	0
2021-03-03	Wednesday	Runnels	20	IA-4	1	2	0	1
2021-03-03	Wednesday	Runnels	21	IA-4	1	1	1	0
2021-03-03	Wednesday	Runnels	22	IA-4	3	1	1	1
2021-03-03	Wednesday	Runnels	23	IA-4	2	1	0	1
2021-03-03	Wednesday	Runnels	24	IA-4	3	3	1	0
2021-03-03	Wednesday	Runnels	25	IA-4	1	2	1	1
2021-03-03	Wednesday	Runnels	26	IA-4	2	1	1	1
2021-03-03	Wednesday	Runnels	27	IA-4	2	2	1	0
2021-03-03	Wednesday	Runnels	28	IA-4	2	1	0	1
2021-03-03	Wednesday	Runnels	29	IA-4	2	2	1	0
2021-03-03	Wednesday	Runnels	30	IA-4	2	1	1	1
2021-03-03	Wednesday	Runnels	31	IA-4	1	3	1	1
2021-03-03	Wednesday	Runnels	32	IA-4	1	1	1	0
2021-03-03	Wednesday	Runnels	33	IA-4	1	1	1	0
2021-03-03	Wednesday	Runnels	34	IA-4	3	1	1	1
2021-03-03	Wednesday	Runnels	35	IA-4	1	1	1	0
2021-03-03	Wednesday	Runnels	36	IA-4	1	1	1	0
2021-03-03	Wednesday	Runnels	37	IA-4	2	1	0	1
2021-03-03	Wednesday	Runnels	38	IA-4	3	3	1	0
2021-03-03	Wednesday	Runnels	39	IA-4	2	2	1	0
2021-03-03	Wednesday	Runnels	40	IA-4	3	3	1	0
2021-03-04	Thursday	Cheaps	1	IA-4	1	0	1	1
2021-03-04	Thursday	Cheaps	2	IA-4	1	2	1	1
2021-03-04	Thursday	Cheaps	3	IA-4	1	2	1	1
2021-03-04	Thursday	Cheaps	4	IA-4	1	2	1	1
2021-03-04	Thursday	Cheaps	5	IA-4	1	0	1	1
2021-03-04	Thursday	Cheaps	6	IA-4	1	3	0	1
2021-03-04	Thursday	Cheaps	7	IA-4	1	2	1	1
2021-03-04	Thursday	Cheaps	8	IA-4	1	0	1	1
2021-03-04	Thursday	Cheaps	9	IA-4	1	1	1	0
2021-03-04	Thursday	Cheaps	10	IA-4	1	2	0	1
2021-03-04	Thursday	Cheaps	11	IA-4	1	2	0	1
2021-03-04	Thursday	Cheaps	12	IA-4	1	3	1	1
2021-03-04	Thursday	Cheaps	13	IA-4	1	2	1	1
2021-03-04	Thursday	Cheaps	14	IA-4	1	3	0	1
2021-03-04	Thursday	Cheaps	15	IA-4	1	3	1	1
2021-03-04	Thursday	Cheaps	16	IA-4	1	2	1	1
2021-03-04	Thursday	Cheaps	17	IA-4	1	0	1	1
2021-03-04	Thursday	Cheaps	18	IA-4	1	3	0	1
2021-03-04	Thursday	Cheaps	19	IA-4	1	2	1	1
2021-03-04	Thursday	Cheaps	20	IA-4	1	2	1	1
2021-03-04	Thursday	Cheaps	21	IA-4	1	2	0	1
2021-03-04	Thursday	Cheaps	22	IA-4	1	3	1	1
2021-03-04	Thursday	Cheaps	23	IA-4	1	3	1	1
2021-03-04	Thursday	Cheaps	24	IA-4	1	2	0	1
2021-03-04	Thursday	Cheaps	25	IA-4	1	0	1	1
2021-03-04	Thursday	Cheaps	26	IA-4	1	2	1	1
2021-03-04	Thursday	Cheaps	27	IA-4	1	0	1	1
2021-03-04	Thursday	Cheaps	28	IA-4	1	0	1	1
2021-03-04	Thursday	Cheaps	29	IA-4	1	1	1	0
2021-03-04	Thursday	Cheaps	30	IA-4	1	1	1	0
2021-03-04	Thursday	Cheaps	31	IA-4	1	2	0	1
2021-03-04	Thursday	Cheaps	32	IA-4	1	3	1	1
2021-03-04	Thursday	Cheaps	33	IA-4	1	0	1	1
2021-03-04	Thursday	Cheaps	34	IA-4	1	2	1	1
2021-03-04	Thursday	Cheaps	35	IA-4	1	0	1	1
2021-03-04	Thursday	Cheaps	36	IA-4	1	1	1	0
2021-03-04	Thursday	Cheaps	37	IA-4	1	2	0	1
2021-03-04	Thursday	Cheaps	38	IA-4	1	0	1	1
2021-03-04	Thursday	Cheaps	39	IA-4	1	0	1	1
2021-03-04	Thursday	Cheaps	40	IA-4	1	3	1	1
2021-03-04	Thursday	Runnels	1	IA-4	2	2	1	0
2021-03-04	Thursday	Runnels	2	IA-4	2	2	1	0
2021-03-04	Thursday	Runnels	3	IA-4	3	3	1	0
2021-03-04	Thursday	Runnels	4	IA-4	2	0	1	1
2021-03-04	Thursday	Runnels	5	IA-4	3	2	0	1
2021-03-04	Thursday	Runnels	6	IA-4	2	2	1	0
2021-03-04	Thursday	Runnels	7	IA-4	2	2	1	0
2021-03-04	Thursday	Runnels	8	IA-4	1	1	1	0
2021-03-04	Thursday	Runnels	9	IA-4	1	2	0	1
2021-03-04	Thursday	Runnels	10	IA-4	1	3	0	1
2021-03-04	Thursday	Runnels	11	IA-4	1	1	1	0
2021-03-04	Thursday	Runnels	12	IA-4	3	3	1	0
2021-03-04	Thursday	Runnels	13	IA-4	2	3	0	1
2021-03-04	Thursday	Runnels	14	IA-4	2	1	0	1
2021-03-04	Thursday	Runnels	15	IA-4	3	1	0	1
2021-03-04	Thursday	Runnels	16	IA-4	2	2	1	0
2021-03-04	Thursday	Runnels	17	IA-4	3	0	1	1
2021-03-04	Thursday	Runnels	18	IA-4	1	1	1	0
2021-03-04	Thursday	Runnels	19	IA-4	2	2	1	0
2021-03-04	Thursday	Runnels	20	IA-4	2	2	1	0
2021-03-04	Thursday	Runnels	21	IA-4	3	1	0	1
2021-03-04	Thursday	Runnels	22	IA-4	3	0	1	1
2021-03-04	Thursday	Runnels	23	IA-4	3	1	0	1
2021-03-04	Thursday	Runnels	24	IA-4	3	0	1	1
2021-03-04	Thursday	Runnels	25	IA-4	3	0	1	1
2021-03-04	Thursday	Runnels	26	IA-4	2	2	1	0
2021-03-04	Thursday	Runnels	27	IA-4	1	1	1	0
2021-03-04	Thursday	Runnels	28	IA-4	1	1	1	0
2021-03-04	Thursday	Runnels	29	IA-4	1	1	1	0
2021-03-04	Thursday	Runnels	30	IA-4	1	1	1	0
2021-03-04	Thursday	Runnels	31	IA-4	3	3	1	0
2021-03-04	Thursday	Runnels	32	IA-4	3	3	1	0
2021-03-04	Thursday	Runnels	33	IA-4	1	1	1	0
2021-03-04	Thursday	Runnels	34	IA-4	2	0	1	1
2021-03-04	Thursday	Runnels	35	IA-4	3	3	1	0
2021-03-04	Thursday	Runnels	36	IA-4	1	1	1	0
2021-03-04	Thursday	Runnels	37	IA-4	3	3	1	0
2021-03-04	Thursday	Runnels	38	IA-4	1	1	1	0
2021-03-04	Thursday	Runnels	39	IA-4	3	1	0	1
2021-03-04	Thursday	Runnels	40	IA-4	2	0	1	1
2021-03-05	Friday	Cheaps	1	IA-4	3	1	0	1
2021-03-05	Friday	Cheaps	2	IA-4	1	2	0	1
2021-03-05	Friday	Cheaps	3	IA-4	1	1	1	0
2021-03-05	Friday	Cheaps	4	IA-4	2	2	1	0
2021-03-05	Friday	Cheaps	5	IA-4	2	3	0	1
2021-03-05	Friday	Cheaps	6	IA-4	2	2	1	0
2021-03-05	Friday	Cheaps	7	IA-4	1	1	1	0
2021-03-05	Friday	Cheaps	8	IA-4	1	2	0	1
2021-03-05	Friday	Cheaps	9	IA-4	3	0	1	1
2021-03-05	Friday	Cheaps	10	IA-4	3	2	0	1
2021-03-05	Friday	Cheaps	11	IA-4	1	1	1	0
2021-03-05	Friday	Cheaps	12	IA-4	1	2	0	1
2021-03-05	Friday	Cheaps	13	IA-4	3	1	0	1
2021-03-05	Friday	Cheaps	14	IA-4	2	2	1	0
2021-03-05	Friday	Cheaps	15	IA-4	3	3	1	0
2021-03-05	Friday	Cheaps	16	IA-4	3	3	1	0
2021-03-05	Friday	Cheaps	17	IA-4	3	3	1	0
2021-03-05	Friday	Cheaps	18	IA-4	3	2	0	1
2021-03-05	Friday	Cheaps	19	IA-4	1	3	0	1
2021-03-05	Friday	Cheaps	20	IA-4	3	1	0	1
2021-03-05	Friday	Cheaps	21	IA-4	2	2	1	0
2021-03-05	Friday	Cheaps	22	IA-4	3	3	1	0
2021-03-05	Friday	Cheaps	23	IA-4	3	3	1	0
2021-03-05	Friday	Cheaps	24	IA-4	2	2	1	0
2021-03-05	Friday	Cheaps	25	IA-4	1	2	0	1
2021-03-05	Friday	Cheaps	26	IA-4	3	1	0	1
2021-03-05	Friday	Cheaps	27	IA-4	3	1	0	1
2021-03-05	Friday	Cheaps	28	IA-4	1	2	0	1
2021-03-05	Friday	Cheaps	29	IA-4	3	3	1	0
2021-03-05	Friday	Cheaps	30	IA-4	3	3	1	0
2021-03-05	Friday	Cheaps	31	IA-4	1	3	0	1
2021-03-05	Friday	Cheaps	32	IA-4	1	2	0	1
2021-03-05	Friday	Cheaps	33	IA-4	2	2	1	0
2021-03-05	Friday	Cheaps	34	IA-4	3	3	1	0
2021-03-05	Friday	Cheaps	35	IA-4	3	3	1	0
2021-03-05	Friday	Cheaps	36	IA-4	1	1	1	0
2021-03-05	Friday	Cheaps	37	IA-4	3	1	0	1
2021-03-05	Friday	Cheaps	38	IA-4	3	2	0	1
2021-03-05	Friday	Cheaps	39	IA-4	1	1	1	0
2021-03-05	Friday	Cheaps	40	IA-4	2	2	1	0
2021-03-05	Friday	Runnels	1	IA-4	3	3	1	0
2021-03-05	Friday	Runnels	2	IA-4	3	3	1	0
2021-03-05	Friday	Runnels	3	IA-4	1	0	1	1
2021-03-05	Friday	Runnels	4	IA-4	1	0	1	1
2021-03-05	Friday	Runnels	5	IA-4	2	2	1	0
2021-03-05	Friday	Runnels	6	IA-4	2	0	1	1
2021-03-05	Friday	Runnels	7	IA-4	2	2	1	0
2021-03-05	Friday	Runnels	8	IA-4	1	1	1	0
2021-03-05	Friday	Runnels	9	IA-4	3	0	1	1
2021-03-05	Friday	Runnels	10	IA-4	1	1	0	0
2021-03-05	Friday	Runnels	11	IA-4	1	3	0	1
2021-03-05	Friday	Runnels	12	IA-4	2	3	0	1
2021-03-05	Friday	Runnels	13	IA-4	1	1	1	0
2021-03-05	Friday	Runnels	14	IA-4	2	0	1	1
2021-03-05	Friday	Runnels	15	IA-4	2	2	1	0
2021-03-05	Friday	Runnels	16	IA-4	2	2	1	0
2021-03-05	Friday	Runnels	17	IA-4	3	0	1	1
2021-03-05	Friday	Runnels	18	IA-4	3	2	0	1
2021-03-05	Friday	Runnels	19	IA-4	3	0	1	1
2021-03-05	Friday	Runnels	20	IA-4	2	2	1	0
2021-03-05	Friday	Runnels	21	IA-4	1	3	0	1
2021-03-05	Friday	Runnels	22	IA-4	2	2	1	0
2021-03-05	Friday	Runnels	23	IA-4	1	1	1	0
2021-03-05	Friday	Runnels	24	IA-4	3	3	1	0
2021-03-05	Friday	Runnels	25	IA-4	1	1	1	0
2021-03-05	Friday	Runnels	26	IA-4	2	0	1	1
2021-03-05	Friday	Runnels	27	IA-4	3	0	1	1
2021-03-05	Friday	Runnels	28	IA-4	1	1	1	0
2021-03-05	Friday	Runnels	29	IA-4	1	0	1	1
2021-03-05	Friday	Runnels	30	IA-4	2	2	1	0
2021-03-05	Friday	Runnels	31	IA-4	2	1	1	1
2021-03-05	Friday	Runnels	32	IA-4	3	1	0	1
2021-03-05	Friday	Runnels	33	IA-4	3	0	1	1
2021-03-05	Friday	Runnels	34	IA-4	1	1	1	0
2021-03-05	Friday	Runnels	35	IA-4	2	2	1	0
2021-03-05	Friday	Runnels	36	IA-4	3	3	1	0
2021-03-05	Friday	Runnels	37	IA-4	2	2	1	0
2021-03-05	Friday	Runnels	38	IA-4	1	1	1	0
2021-03-05	Friday	Runnels	39	IA-4	2	3	0	1
2021-03-05	Friday	Runnels	40	IA-4	1	0	1	1
2021-03-08	Monday	Cheaps	1	IA-4	3	1	0	1
2021-03-08	Monday	Cheaps	2	IA-4	1	1	1	0
2021-03-08	Monday	Cheaps	3	IA-4	3	3	1	0
2021-03-08	Monday	Cheaps	4	IA-4	2	3	0	1
2021-03-08	Monday	Cheaps	5	IA-4	2	2	1	0
2021-03-08	Monday	Cheaps	6	IA-4	2	2	1	0
2021-03-08	Monday	Cheaps	7	IA-4	1	1	1	0
2021-03-08	Monday	Cheaps	8	IA-4	2	2	1	0
2021-03-08	Monday	Cheaps	9	IA-4	2	2	1	0
2021-03-08	Monday	Cheaps	10	IA-4	3	3	1	0
2021-03-08	Monday	Cheaps	11	IA-4	2	2	1	0
2021-03-08	Monday	Cheaps	12	IA-4	1	1	1	0
2021-03-08	Monday	Cheaps	13	IA-4	1	2	0	1
2021-03-08	Monday	Cheaps	14	IA-4	2	2	1	0
2021-03-08	Monday	Cheaps	15	IA-4	2	2	1	0
2021-03-08	Monday	Cheaps	16	IA-4	2	2	1	0
2021-03-08	Monday	Cheaps	17	IA-4	3	2	0	1
2021-03-08	Monday	Cheaps	18	IA-4	3	3	1	0
2021-03-08	Monday	Cheaps	19	IA-4	1	2	0	1
2021-03-08	Monday	Cheaps	20	IA-4	2	2	1	0
2021-03-08	Monday	Cheaps	21	IA-4	3	2	0	1
2021-03-08	Monday	Cheaps	22	IA-4	3	3	1	0
2021-03-08	Monday	Cheaps	23	IA-4	3	1	0	1
2021-03-08	Monday	Cheaps	24	IA-4	2	2	1	0
2021-03-08	Monday	Cheaps	25	IA-4	2	2	1	0
2021-03-08	Monday	Cheaps	26	IA-4	3	3	1	0
2021-03-08	Monday	Cheaps	27	IA-4	1	3	0	1
2021-03-08	Monday	Cheaps	28	IA-4	1	1	1	0
2021-03-08	Monday	Cheaps	29	IA-4	2	2	1	0
2021-03-08	Monday	Cheaps	30	IA-4	3	2	0	1
2021-03-08	Monday	Cheaps	31	IA-4	1	3	0	1
2021-03-08	Monday	Cheaps	32	IA-4	2	2	1	0
2021-03-08	Monday	Cheaps	33	IA-4	1	1	1	0
2021-03-08	Monday	Cheaps	34	IA-4	2	2	1	0
2021-03-08	Monday	Cheaps	35	IA-4	3	3	1	0
2021-03-08	Monday	Cheaps	36	IA-4	2	2	1	0
2021-03-08	Monday	Cheaps	37	IA-4	2	2	1	0
2021-03-08	Monday	Cheaps	38	IA-4	1	1	1	0
2021-03-08	Monday	Cheaps	39	IA-4	1	2	0	1
2021-03-08	Monday	Cheaps	40	IA-4	1	2	0	1
2021-03-08	Monday	Runnels	1	IA-4	2	3	0	1
2021-03-08	Monday	Runnels	2	IA-4	2	3	0	1
2021-03-08	Monday	Runnels	3	IA-4	1	2	0	1
2021-03-08	Monday	Runnels	4	IA-4	1	1	1	0
2021-03-08	Monday	Runnels	5	IA-4	3	3	1	0
2021-03-08	Monday	Runnels	6	IA-4	2	3	0	1
2021-03-08	Monday	Runnels	7	IA-4	1	1	1	0
2021-03-08	Monday	Runnels	8	IA-4	1	3	0	1
2021-03-08	Monday	Runnels	9	IA-4	3	3	1	0
2021-03-08	Monday	Runnels	10	IA-4	3	3	1	0
2021-03-08	Monday	Runnels	11	IA-4	3	3	1	0
2021-03-08	Monday	Runnels	12	IA-4	1	1	1	0
2021-03-08	Monday	Runnels	13	IA-4	1	1	1	0
2021-03-08	Monday	Runnels	14	IA-4	2	2	1	0
2021-03-08	Monday	Runnels	15	IA-4	3	2	0	1
2021-03-08	Monday	Runnels	16	IA-4	3	3	1	0
2021-03-08	Monday	Runnels	17	IA-4	1	2	0	1
2021-03-08	Monday	Runnels	18	IA-4	2	1	0	1
2021-03-08	Monday	Runnels	19	IA-4	2	1	0	1
2021-03-08	Monday	Runnels	20	Food	3	3	1	0
2021-03-08	Monday	Runnels	21	Food	2	2	1	0
2021-03-08	Monday	Runnels	22	Food	1	1	1	0
2021-03-08	Monday	Runnels	23	Food	2	2	1	0
2021-03-08	Monday	Runnels	24	Food	2	2	1	0
2021-03-08	Monday	Runnels	25	Food	3	3	1	0
2021-03-08	Monday	Runnels	26	Food	2	2	1	0
2021-03-08	Monday	Runnels	27	Food	2	2	1	0
2021-03-08	Monday	Runnels	28	Food	1	1	1	0
2021-03-08	Monday	Runnels	29	Food	3	3	1	0
2021-03-08	Monday	Runnels	30	Food	2	2	1	0
2021-03-08	Monday	Runnels	31	Food	1	1	1	0
2021-03-08	Monday	Runnels	32	Food	2	2	1	0
2021-03-08	Monday	Runnels	33	Food	3	3	1	0
2021-03-08	Monday	Runnels	34	Food	1	1	1	0
2021-03-08	Monday	Runnels	35	Food	1	1	1	0
2021-03-08	Monday	Runnels	36	IA-4	3	3	1	0
2021-03-08	Monday	Runnels	37	IA-4	3	3	1	0
2021-03-08	Monday	Runnels	38	IA-4	2	2	1	0
2021-03-08	Monday	Runnels	39	IA-4	2	1	0	1
2021-03-08	Monday	Runnels	40	IA-4	2	2	1	0
2021-03-09	Tuesday	Cheaps	1	IA-4	3	3	1	0
2021-03-09	Tuesday	Cheaps	2	IA-4	2	2	1	0
2021-03-09	Tuesday	Cheaps	3	IA-4	3	3	1	0
2021-03-09	Tuesday	Cheaps	4	IA-4	1	1	1	0
2021-03-09	Tuesday	Cheaps	5	IA-4	1	2	0	1
2021-03-09	Tuesday	Cheaps	6	IA-4	1	2	1	1
2021-03-09	Tuesday	Cheaps	7	IA-4	2	2	1	0
2021-03-09	Tuesday	Cheaps	8	IA-4	1	2	1	1
2021-03-09	Tuesday	Cheaps	9	IA-4	3	2	0	1
2021-03-09	Tuesday	Cheaps	10	IA-4	3	1	0	1
2021-03-09	Tuesday	Cheaps	11	IA-4	1	1	1	0
2021-03-09	Tuesday	Cheaps	12	IA-4	3	1	1	1
2021-03-09	Tuesday	Cheaps	13	IA-4	2	1	0	1
2021-03-09	Tuesday	Cheaps	14	IA-4	3	3	1	0
2021-03-09	Tuesday	Cheaps	15	IA-4	2	2	1	0
2021-03-09	Tuesday	Cheaps	16	IA-4	2	2	1	0
2021-03-09	Tuesday	Cheaps	17	IA-4	2	2	1	0
2021-03-09	Tuesday	Cheaps	18	IA-4	1	1	1	0
2021-03-09	Tuesday	Cheaps	19	IA-4	2	2	1	0
2021-03-09	Tuesday	Cheaps	20	IA-4	1	3	0	1
2021-03-09	Tuesday	Cheaps	21	IA-4	1	2	0	1
2021-03-09	Tuesday	Cheaps	22	IA-4	1	1	1	1
2021-03-09	Tuesday	Cheaps	23	IA-4	1	3	0	1
2021-03-09	Tuesday	Cheaps	24	IA-4	1	1	1	0
2021-03-09	Tuesday	Cheaps	25	IA-4	2	2	1	0
2021-03-09	Tuesday	Cheaps	26	IA-4	1	1	1	0
2021-03-09	Tuesday	Cheaps	27	IA-4	2	2	1	0
2021-03-09	Tuesday	Cheaps	28	IA-4	1	2	0	1
2021-03-09	Tuesday	Cheaps	29	IA-4	2	2	1	0
2021-03-09	Tuesday	Cheaps	30	IA-4	1	1	1	1
2021-03-09	Tuesday	Cheaps	31	IA-4	1	1	1	0
2021-03-09	Tuesday	Cheaps	32	IA-4	3	2	0	1
2021-03-09	Tuesday	Cheaps	33	IA-4	3	3	1	0
2021-03-09	Tuesday	Cheaps	34	IA-4	3	3	1	0
2021-03-09	Tuesday	Cheaps	35	IA-4	2	2	1	0
2021-03-09	Tuesday	Cheaps	36	IA-4	1	1	1	0
2021-03-09	Tuesday	Cheaps	37	IA-4	2	2	1	0
2021-03-09	Tuesday	Cheaps	38	IA-4	1	1	1	0
2021-03-09	Tuesday	Cheaps	39	IA-4	3	2	0	1
2021-03-09	Tuesday	Cheaps	40	IA-4	2	1	0	1
2021-03-09	Tuesday	Runnels	1	IA-4	1	1	1	0
2021-03-09	Tuesday	Runnels	2	IA-4	2	2	1	0
2021-03-09	Tuesday	Runnels	3	IA-4	3	3	1	0
2021-03-09	Tuesday	Runnels	4	IA-4	2	2	1	0
2021-03-09	Tuesday	Runnels	5	IA-4	1	2	1	1
2021-03-09	Tuesday	Runnels	6	IA-4	3	1	0	1
2021-03-09	Tuesday	Runnels	7	IA-4	2	2	1	0
2021-03-09	Tuesday	Runnels	8	IA-4	1	2	1	1
2021-03-09	Tuesday	Runnels	9	IA-4	3	2	1	1
2021-03-09	Tuesday	Runnels	10	IA-4	1	3	0	1
2021-03-09	Tuesday	Runnels	11	IA-4	1	1	1	0
2021-03-09	Tuesday	Runnels	12	IA-4	2	2	1	0
2021-03-09	Tuesday	Runnels	13	IA-4	2	2	1	0
2021-03-09	Tuesday	Runnels	14	IA-4	3	1	1	1
2021-03-09	Tuesday	Runnels	15	IA-4	3	3	1	0
2021-03-09	Tuesday	Runnels	16	IA-4	3	2	0	1
2021-03-09	Tuesday	Runnels	17	IA-4	3	3	1	0
2021-03-09	Tuesday	Runnels	18	IA-4	2	1	1	1
2021-03-09	Tuesday	Runnels	19	IA-4	2	2	1	0
2021-03-09	Tuesday	Runnels	20	IA-4	2	2	1	0
2021-03-09	Tuesday	Runnels	21	IA-4	3	3	1	0
2021-03-09	Tuesday	Runnels	22	IA-4	1	1	1	0
2021-03-09	Tuesday	Runnels	23	IA-4	2	2	1	0
2021-03-09	Tuesday	Runnels	24	IA-4	1	1	1	0
2021-03-09	Tuesday	Runnels	25	IA-4	2	3	1	1
2021-03-09	Tuesday	Runnels	26	IA-4	2	2	1	0
2021-03-09	Tuesday	Runnels	27	IA-4	3	2	0	1
2021-03-09	Tuesday	Runnels	28	IA-4	2	1	0	1
2021-03-09	Tuesday	Runnels	29	IA-4	3	3	1	0
2021-03-09	Tuesday	Runnels	30	IA-4	1	1	1	0
2021-03-09	Tuesday	Runnels	31	IA-4	3	3	1	0
2021-03-09	Tuesday	Runnels	32	IA-4	3	3	1	0
2021-03-09	Tuesday	Runnels	33	IA-4	2	2	1	0
2021-03-09	Tuesday	Runnels	34	IA-4	2	2	1	0
2021-03-09	Tuesday	Runnels	35	IA-4	3	3	1	0
2021-03-09	Tuesday	Runnels	36	IA-4	1	2	1	1
2021-03-09	Tuesday	Runnels	37	IA-4	3	1	1	1
2021-03-09	Tuesday	Runnels	38	IA-4	3	3	1	0
2021-03-09	Tuesday	Runnels	39	IA-4	1	1	1	0
2021-03-09	Tuesday	Runnels	40	IA-4	1	3	1	1
2021-03-10	Wednesday	Cheaps	1	IA-4	1	2	0	1
2021-03-10	Wednesday	Cheaps	2	IA-4	1	1	1	0
2021-03-10	Wednesday	Cheaps	3	IA-4	1	3	1	1
2021-03-10	Wednesday	Cheaps	4	IA-4	1	1	1	0
2021-03-10	Wednesday	Cheaps	5	IA-4	1	2	0	1
2021-03-10	Wednesday	Cheaps	6	IA-4	3	1	1	1
2021-03-10	Wednesday	Cheaps	7	IA-4	2	2	1	0
2021-03-10	Wednesday	Cheaps	8	IA-4	3	1	0	1
2021-03-10	Wednesday	Cheaps	9	IA-4	1	1	1	0
2021-03-10	Wednesday	Cheaps	10	IA-4	2	1	0	1
2021-03-10	Wednesday	Cheaps	11	IA-4	3	3	1	0
2021-03-10	Wednesday	Cheaps	12	IA-4	3	1	0	1
2021-03-10	Wednesday	Cheaps	13	IA-4	3	3	1	0
2021-03-10	Wednesday	Cheaps	14	IA-4	1	2	0	1
2021-03-10	Wednesday	Cheaps	15	IA-4	2	2	1	0
2021-03-10	Wednesday	Cheaps	16	IA-4	1	3	1	1
2021-03-10	Wednesday	Cheaps	17	IA-4	3	3	1	0
2021-03-10	Wednesday	Cheaps	18	IA-4	2	2	1	0
2021-03-10	Wednesday	Cheaps	19	IA-4	3	2	0	1
2021-03-10	Wednesday	Cheaps	20	IA-4	3	1	0	1
2021-03-10	Wednesday	Cheaps	21	IA-4	3	1	1	1
2021-03-10	Wednesday	Cheaps	22	IA-4	3	2	0	1
2021-03-10	Wednesday	Cheaps	23	IA-4	3	3	1	0
2021-03-10	Wednesday	Cheaps	24	IA-4	3	1	0	1
2021-03-10	Wednesday	Cheaps	25	IA-4	2	2	1	0
2021-03-10	Wednesday	Cheaps	26	IA-4	1	2	0	1
2021-03-10	Wednesday	Cheaps	27	IA-4	3	2	1	1
2021-03-10	Wednesday	Cheaps	28	IA-4	3	2	0	1
2021-03-10	Wednesday	Cheaps	29	IA-4	3	2	0	1
2021-03-10	Wednesday	Cheaps	30	IA-4	2	3	0	1
2021-03-10	Wednesday	Cheaps	31	IA-4	1	1	1	0
2021-03-10	Wednesday	Cheaps	32	IA-4	1	1	1	0
2021-03-10	Wednesday	Cheaps	33	IA-4	3	2	0	1
2021-03-10	Wednesday	Cheaps	34	IA-4	3	1	0	1
2021-03-10	Wednesday	Cheaps	35	IA-4	2	2	1	0
2021-03-10	Wednesday	Cheaps	36	IA-4	3	2	0	1
2021-03-10	Wednesday	Cheaps	37	IA-4	3	3	1	0
2021-03-10	Wednesday	Cheaps	38	IA-4	2	2	1	0
2021-03-10	Wednesday	Cheaps	39	IA-4	3	2	1	1
2021-03-10	Wednesday	Cheaps	40	IA-4	3	2	0	1
2021-03-10	Wednesday	Runnels	1	IA-4	3	2	0	1
2021-03-10	Wednesday	Runnels	2	IA-4	1	1	1	0
2021-03-10	Wednesday	Runnels	3	IA-4	3	3	1	0
2021-03-10	Wednesday	Runnels	4	IA-4	2	2	1	0
2021-03-10	Wednesday	Runnels	5	IA-4	3	3	1	0
2021-03-10	Wednesday	Runnels	6	IA-4	1	1	1	0
2021-03-10	Wednesday	Runnels	7	IA-4	3	3	1	0
2021-03-10	Wednesday	Runnels	8	IA-4	2	3	0	1
2021-03-10	Wednesday	Runnels	9	IA-4	3	3	1	0
2021-03-10	Wednesday	Runnels	10	IA-4	2	2	1	0
2021-03-10	Wednesday	Runnels	11	IA-4	2	2	1	0
2021-03-10	Wednesday	Runnels	12	IA-4	2	2	1	0
2021-03-10	Wednesday	Runnels	13	IA-4	1	1	1	0
2021-03-10	Wednesday	Runnels	14	IA-4	2	2	1	0
2021-03-10	Wednesday	Runnels	15	IA-4	1	1	1	0
2021-03-10	Wednesday	Runnels	16	IA-4	2	1	1	1
2021-03-10	Wednesday	Runnels	17	IA-4	3	2	1	1
2021-03-10	Wednesday	Runnels	18	IA-4	1	1	1	0
2021-03-10	Wednesday	Runnels	19	IA-4	3	3	1	0
2021-03-10	Wednesday	Runnels	20	IA-4	1	1	1	0
2021-03-10	Wednesday	Runnels	21	IA-4	1	1	1	0
2021-03-10	Wednesday	Runnels	22	IA-4	1	3	0	1
2021-03-10	Wednesday	Runnels	23	IA-4	3	2	1	1
2021-03-10	Wednesday	Runnels	24	IA-4	1	1	1	0
2021-03-10	Wednesday	Runnels	25	IA-4	2	2	1	0
2021-03-10	Wednesday	Runnels	26	IA-4	3	3	1	0
2021-03-10	Wednesday	Runnels	27	IA-4	1	1	1	0
2021-03-10	Wednesday	Runnels	28	IA-4	2	1	0	1
2021-03-10	Wednesday	Runnels	29	IA-4	1	1	1	0
2021-03-10	Wednesday	Runnels	30	IA-4	2	1	1	1
2021-03-10	Wednesday	Runnels	31	IA-4	3	3	1	0
2021-03-10	Wednesday	Runnels	32	IA-4	1	1	1	0
2021-03-10	Wednesday	Runnels	33	IA-4	2	3	0	1
2021-03-10	Wednesday	Runnels	34	IA-4	1	1	1	0
2021-03-10	Wednesday	Runnels	35	IA-4	2	1	1	1
2021-03-10	Wednesday	Runnels	36	IA-4	1	2	1	1
2021-03-10	Wednesday	Runnels	37	IA-4	1	1	1	0
2021-03-10	Wednesday	Runnels	38	IA-4	2	2	1	0
2021-03-10	Wednesday	Runnels	39	IA-4	1	1	1	0
2021-03-10	Wednesday	Runnels	40	IA-4	2	2	1	0
2021-03-11	Thursday	Cheaps	1	IA-4	2	2	1	0
2021-03-11	Thursday	Cheaps	2	IA-4	1	2	0	1
2021-03-11	Thursday	Cheaps	3	IA-4	1	1	1	0
2021-03-11	Thursday	Cheaps	4	IA-4	1	1	1	0
2021-03-11	Thursday	Cheaps	5	IA-4	1	2	0	1
2021-03-11	Thursday	Cheaps	6	IA-4	3	3	1	0
2021-03-11	Thursday	Cheaps	7	IA-4	3	1	0	1
2021-03-11	Thursday	Cheaps	8	IA-4	3	1	0	1
2021-03-11	Thursday	Cheaps	9	IA-4	1	1	1	0
2021-03-11	Thursday	Cheaps	10	IA-4	3	3	1	0
2021-03-11	Thursday	Cheaps	11	IA-4	2	2	1	0
2021-03-11	Thursday	Cheaps	12	IA-4	1	2	0	1
2021-03-11	Thursday	Cheaps	13	IA-4	3	3	1	0
2021-03-11	Thursday	Cheaps	14	IA-4	1	3	0	1
2021-03-11	Thursday	Cheaps	15	IA-4	3	1	1	1
2021-03-11	Thursday	Cheaps	16	IA-4	3	2	0	1
2021-03-11	Thursday	Cheaps	17	IA-4	3	2	1	1
2021-03-11	Thursday	Cheaps	18	IA-4	3	3	1	0
2021-03-11	Thursday	Cheaps	19	IA-4	2	2	1	0
2021-03-11	Thursday	Cheaps	20	IA-4	3	1	0	1
2021-03-11	Thursday	Cheaps	21	IA-4	2	2	1	0
2021-03-11	Thursday	Cheaps	22	IA-4	2	2	1	0
2021-03-11	Thursday	Cheaps	23	IA-4	2	2	1	0
2021-03-11	Thursday	Cheaps	24	IA-4	2	2	1	0
2021-03-11	Thursday	Cheaps	25	IA-4	3	1	1	1
2021-03-11	Thursday	Cheaps	26	IA-4	1	3	0	1
2021-03-11	Thursday	Cheaps	27	IA-4	3	2	1	1
2021-03-11	Thursday	Cheaps	28	IA-4	2	2	1	0
2021-03-11	Thursday	Cheaps	29	IA-4	1	2	1	1
2021-03-11	Thursday	Cheaps	30	IA-4	2	2	1	0
2021-03-11	Thursday	Cheaps	31	IA-4	1	1	1	0
2021-03-11	Thursday	Cheaps	32	IA-4	1	1	1	0
2021-03-11	Thursday	Cheaps	33	IA-4	1	1	1	0
2021-03-11	Thursday	Cheaps	34	IA-4	1	1	1	0
2021-03-11	Thursday	Cheaps	35	IA-4	1	2	0	1
2021-03-11	Thursday	Cheaps	36	IA-4	1	2	0	1
2021-03-11	Thursday	Cheaps	37	IA-4	3	3	1	0
2021-03-11	Thursday	Cheaps	38	IA-4	2	3	0	1
2021-03-11	Thursday	Cheaps	39	IA-4	1	3	0	1
2021-03-11	Thursday	Cheaps	40	IA-4	3	2	0	1
2021-03-11	Thursday	Runnels	1	IA-4	3	3	1	0
2021-03-11	Thursday	Runnels	2	IA-4	1	1	1	0
2021-03-11	Thursday	Runnels	3	IA-4	1	1	1	0
2021-03-11	Thursday	Runnels	4	IA-4	3	3	1	0
2021-03-11	Thursday	Runnels	5	IA-4	3	3	1	0
2021-03-11	Thursday	Runnels	6	IA-4	2	2	1	0
2021-03-11	Thursday	Runnels	7	IA-4	2	3	0	1
2021-03-11	Thursday	Runnels	8	IA-4	3	3	1	0
2021-03-11	Thursday	Runnels	9	IA-4	2	2	1	0
2021-03-11	Thursday	Runnels	10	IA-4	3	3	1	0
2021-03-11	Thursday	Runnels	11	IA-4	2	3	0	1
2021-03-11	Thursday	Runnels	12	IA-4	3	3	1	0
2021-03-11	Thursday	Runnels	13	IA-4	2	2	1	0
2021-03-11	Thursday	Runnels	14	IA-4	2	2	1	0
2021-03-11	Thursday	Runnels	15	IA-4	3	3	1	0
2021-03-11	Thursday	Runnels	16	IA-4	1	1	1	0
2021-03-11	Thursday	Runnels	17	IA-4	1	1	1	0
2021-03-11	Thursday	Runnels	18	IA-4	1	3	1	1
2021-03-11	Thursday	Runnels	19	IA-4	2	2	1	0
2021-03-11	Thursday	Runnels	20	IA-4	1	3	1	1
2021-03-11	Thursday	Runnels	21	IA-4	2	2	1	0
2021-03-11	Thursday	Runnels	22	IA-4	2	3	1	1
2021-03-11	Thursday	Runnels	23	IA-4	1	1	1	0
2021-03-11	Thursday	Runnels	24	IA-4	3	3	1	0
2021-03-11	Thursday	Runnels	25	IA-4	1	1	1	0
2021-03-11	Thursday	Runnels	26	IA-4	2	2	1	0
2021-03-11	Thursday	Runnels	27	IA-4	2	2	1	0
2021-03-11	Thursday	Runnels	28	IA-4	3	3	1	0
2021-03-11	Thursday	Runnels	29	IA-4	1	1	1	0
2021-03-11	Thursday	Runnels	30	IA-4	3	3	1	0
2021-03-11	Thursday	Runnels	31	IA-4	3	3	1	0
2021-03-11	Thursday	Runnels	32	IA-4	1	1	1	0
2021-03-11	Thursday	Runnels	33	IA-4	2	2	1	0
2021-03-11	Thursday	Runnels	34	IA-4	2	2	1	0
2021-03-11	Thursday	Runnels	35	IA-4	2	3	1	1
2021-03-11	Thursday	Runnels	36	IA-4	1	1	1	0
2021-03-11	Thursday	Runnels	37	IA-4	2	2	1	0
2021-03-11	Thursday	Runnels	38	IA-4	2	2	1	0
2021-03-11	Thursday	Runnels	39	IA-4	2	2	1	0
2021-03-11	Thursday	Runnels	40	IA-4	3	2	0	1
2021-03-12	Friday	Cheaps	1	Food	1	1	1	0
2021-03-12	Friday	Cheaps	2	Food	3	3	1	0
2021-03-12	Friday	Cheaps	3	Food	3	3	1	0
2021-03-12	Friday	Cheaps	4	Food	3	3	1	0
2021-03-12	Friday	Cheaps	5	Food	2	2	1	0
2021-03-12	Friday	Cheaps	6	Food	2	2	1	0
2021-03-12	Friday	Cheaps	7	Food	2	2	1	0
2021-03-12	Friday	Cheaps	8	Food	3	3	1	0
2021-03-12	Friday	Cheaps	9	Food	2	2	1	0
2021-03-12	Friday	Cheaps	10	Food	1	1	1	0
2021-03-12	Friday	Cheaps	11	Food	2	2	1	0
2021-03-12	Friday	Cheaps	12	Food	3	3	1	0
2021-03-12	Friday	Cheaps	13	Food	1	1	1	0
2021-03-12	Friday	Cheaps	14	Food	2	2	1	0
2021-03-12	Friday	Cheaps	15	Food	3	3	1	0
2021-03-12	Friday	Cheaps	16	Food	2	2	1	0
2021-03-12	Friday	Cheaps	17	Food	3	3	1	0
2021-03-12	Friday	Cheaps	18	Food	2	2	1	0
2021-03-12	Friday	Cheaps	19	Food	3	3	1	0
2021-03-12	Friday	Cheaps	20	Food	3	3	1	0
2021-03-12	Friday	Cheaps	21	Food	3	3	1	0
2021-03-12	Friday	Cheaps	22	Food	1	1	1	0
2021-03-12	Friday	Cheaps	23	Food	2	2	1	0
2021-03-12	Friday	Cheaps	24	Food	3	3	1	0
2021-03-12	Friday	Cheaps	25	Food	1	1	1	0
2021-03-12	Friday	Cheaps	26	Food	1	1	1	0
2021-03-12	Friday	Cheaps	27	Food	3	3	1	0
2021-03-12	Friday	Cheaps	28	Food	3	3	1	0
2021-03-12	Friday	Cheaps	29	Food	1	1	1	0
2021-03-12	Friday	Cheaps	30	Food	2	2	1	0
2021-03-12	Friday	Cheaps	31	Food	2	2	1	0
2021-03-12	Friday	Cheaps	32	Food	3	3	1	0
2021-03-12	Friday	Cheaps	33	Food	3	3	1	0
2021-03-12	Friday	Cheaps	34	Food	3	3	1	0
2021-03-12	Friday	Cheaps	35	Food	2	2	1	0
2021-03-12	Friday	Cheaps	36	Food	2	2	1	0
2021-03-12	Friday	Cheaps	37	Food	1	1	1	0
2021-03-12	Friday	Cheaps	38	Food	3	3	1	0
2021-03-12	Friday	Cheaps	39	Food	3	3	1	0
2021-03-12	Friday	Cheaps	40	Food	3	3	1	0
2021-03-12	Friday	Runnels	1	IA-4	1	1	1	0
2021-03-12	Friday	Runnels	2	IA-4	1	1	1	0
2021-03-12	Friday	Runnels	3	IA-4	1	1	1	0
2021-03-12	Friday	Runnels	4	IA-4	3	1	1	1
2021-03-12	Friday	Runnels	5	IA-4	1	1	1	0
2021-03-12	Friday	Runnels	6	IA-4	3	3	1	0
2021-03-12	Friday	Runnels	7	IA-4	2	2	1	0
2021-03-12	Friday	Runnels	8	IA-4	2	2	1	0
2021-03-12	Friday	Runnels	9	IA-4	1	2	1	1
2021-03-12	Friday	Runnels	10	IA-4	2	2	1	0
2021-03-12	Friday	Runnels	11	IA-4	3	3	1	0
2021-03-12	Friday	Runnels	12	IA-4	3	2	1	1
2021-03-12	Friday	Runnels	13	IA-4	2	2	1	0
2021-03-12	Friday	Runnels	14	IA-4	2	2	1	0
2021-03-12	Friday	Runnels	15	IA-4	1	1	1	0
2021-03-12	Friday	Runnels	16	IA-4	1	1	1	0
2021-03-12	Friday	Runnels	17	IA-4	1	1	1	0
2021-03-12	Friday	Runnels	18	IA-4	2	2	1	0
2021-03-12	Friday	Runnels	19	IA-4	3	3	1	0
2021-03-12	Friday	Runnels	20	IA-4	2	2	1	0
2021-03-12	Friday	Runnels	21	IA-4	3	3	1	0
2021-03-12	Friday	Runnels	22	IA-4	1	1	1	0
2021-03-12	Friday	Runnels	23	IA-4	1	1	1	0
2021-03-12	Friday	Runnels	24	IA-4	1	1	1	0
2021-03-12	Friday	Runnels	25	IA-4	3	3	1	0
2021-03-12	Friday	Runnels	26	IA-4	2	2	1	0
2021-03-12	Friday	Runnels	27	IA-4	2	2	1	0
2021-03-12	Friday	Runnels	28	IA-4	1	1	1	0
2021-03-12	Friday	Runnels	29	IA-4	1	1	1	0
2021-03-12	Friday	Runnels	30	IA-4	2	2	1	0
2021-03-12	Friday	Runnels	31	IA-4	1	1	1	0
2021-03-12	Friday	Runnels	32	IA-4	1	1	1	0
2021-03-12	Friday	Runnels	33	IA-4	3	2	0	1
2021-03-12	Friday	Runnels	34	IA-4	3	3	1	0
2021-03-12	Friday	Runnels	35	IA-4	1	1	1	0
2021-03-12	Friday	Runnels	36	IA-4	2	2	1	0
2021-03-12	Friday	Runnels	37	IA-4	1	1	1	0
2021-03-12	Friday	Runnels	38	IA-4	3	3	1	0
2021-03-12	Friday	Runnels	39	IA-4	1	1	1	0
[truncated: 7,681 more rows]
